1 **Associations Between Nutrition, Gut Microbiome, and Health in A Novel Nonhuman**  
2 **Primate Model**

3  
4 Jonathan B. Clayton<sup>a,b,c</sup>, Gabriel A. Al-Ghalith<sup>d</sup>, Ha Thang Long<sup>b,c,e</sup>, Bui Van Tuan<sup>b</sup>, Francis  
5 Cabana<sup>c,f</sup>, Hu Huang<sup>d</sup>, Pajau Vangay<sup>d,g</sup>, Tonya Ward<sup>g</sup>, Vo Van Minh<sup>h</sup>, Nguyen Ai Tam<sup>b</sup>, Nguyen  
6 Tat Dat<sup>b</sup>, Dominic A. Travis<sup>c,i</sup>, Michael P. Murtaugh<sup>a</sup>, Herbert Covert<sup>j</sup>, Kenneth E. Glander<sup>c,k</sup>,  
7 Tilo Nadler<sup>l</sup>, Barbara Toddes<sup>m</sup>, John C.M. Sha<sup>n</sup>, Randall S. Singer<sup>a</sup>, Dan Knights<sup>c,d,g,o</sup>, and  
8 Timothy J. Johnson<sup>a,c,p\*</sup>

9  
10 <sup>a</sup>Department of Veterinary and Biomedical Sciences, University of Minnesota, 1971  
11 Commonwealth Avenue, Saint Paul, MN 55108, USA

12 <sup>b</sup>GreenViet Biodiversity Conservation Center, K39/21 Thanh Vinh Street, Son Tra District,  
13 Danang, Vietnam

14 <sup>c</sup>Primate Microbiome Project, 6-124 MCB, 420 Washington Ave SE, Minneapolis, MN 55455,  
15 USA

16 <sup>d</sup>Biomedical Informatics and Computational Biology, 200 Union St SE, University of Minnesota,  
17 Minneapolis, MN 55455, USA

18 <sup>e</sup>Frankfurt Zoological Society, Bernhard-Grzimek-Allee 1, 60316 Frankfurt, Germany

19 <sup>f</sup>Wildlife Nutrition Centre, Wildlife Reserves Singapore, 80 Mandai Lake Road, 729826,  
20 Singapore

21 <sup>g</sup>Biotechnology Institute, University of Minnesota, 1479 Gortner Avenue, Saint Paul, MN 55108,  
22 USA

23 <sup>h</sup>Faculty of Biology and Environmental Science, The University of Danang - University of  
24 Science and Education, 459 Ton Duc Thang Street, Lien Chieu District, Danang, Vietnam

25 <sup>i</sup>Department of Veterinary Population Medicine, University of Minnesota, 1365 Gortner Avenue,  
26 225 Veterinary Medical Center, Saint Paul, MN 55108, USA

27 <sup>j</sup>Department of Anthropology, University of Colorado Boulder, 1350 Pleasant St, 233 UCB,  
28 Boulder, CO 80309, USA

29 <sup>k</sup>Department of Evolutionary Anthropology, Duke University, 130 Science Drive, 104 Biological  
30 Sciences, Durham, NC 27708, USA

31 <sup>l</sup>Endangered Primate Rescue Center, Cuc Phuong National Park, Nho Quan District, Ninh Binh  
32 Province, Vietnam

33 <sup>m</sup>Philadelphia Zoological Garden, 3400 West Girard Avenue, Philadelphia, PA 19108, USA

34 <sup>n</sup>School of Sociology and Anthropology, Sun Yat-Sen University, Guangzhou, 510275, China

35 <sup>o</sup>Department of Computer Science and Engineering, University of Minnesota, 4-192 Keller Hall,  
36 200 Union St SE, Minneapolis, MN 55455, USA

37 <sup>p</sup>University of Minnesota, Mid-Central Research and Outreach Center, Willmar, Minnesota,  
38 USA

39  
40 \*Corresponding author:

41 Dr. Timothy J. Johnson  
42 University of Minnesota  
43 Department of Veterinary and Biomedical Science  
44 1971 Commonwealth Avenue, 205 Veterinary Science  
45 Saint Paul, MN 55108  
46 joh04207@umn.edu

47  
48  
49  
50  
51  
52  
53  
54  
55  
56  
57  
58  
59  
60  
61  
62  
63  
64  
65  
66  
67

Keywords: Microbiome, Primate, Colobine, Diet, Health, Captivity

**ABSTRACT:**

Red-shanked doucs (*Pygathrix nemaeus*) are endangered, foregut-fermenting colobine primates which are difficult to maintain in captivity. There are critical gaps in our understanding of their natural dietary habits including consumption of leaves, unripe fruit, flowers, seeds, and other plant parts. There is also a lack of understanding of enteric adaptations, including their unique microflora. To address these knowledge gaps, we used the douc as a model to study relationships between gastrointestinal microbial community structure, diet, and health. We analyzed published fecal samples as well as detailed dietary history from doucs with four distinct lifestyles (wild, semi-wild, semi-captive, and captive) and determined gastrointestinal bacterial microbiome composition using 16S rRNA sequencing. A clear gradient of microbiome composition was revealed along an axis of natural lifestyle disruption, including significant associations with diet, health, biodiversity, and microbial function. We identified potential microbial biomarkers of douc dysbiosis, including *Bacteroides* and *Prevotella*. Our results suggest a gradient-like shift in captivity causes an attendant shift to severe gut dysbiosis, thereby resulting in gastrointestinal issues.

68 **INTRODUCTION:**

69 The primate gastrointestinal (GI) tract is home to trillions of bacteria that play major roles in  
70 digestion and metabolism, immune system development, pathogen resistance, and other  
71 important aspects of host health and behavior. While there has been substantial progress in  
72 understanding the role microbial communities play in human health and disease, less attention  
73 has been given to host-associated microbiomes and diet in nonhuman primates (NHPs).  
74 Developing a better understanding of the link between primate microbial communities, diet, and  
75 health is important not only in the context of primate ecology, but also may have profound  
76 implications for use of NHPs as model systems for health and microbial associations.

77  
78 One colobine primate species, the red-shanked douc (i.e., douc), is of particular interest as a  
79 model organism. Because it performs both foregut fermentation and hindgut digestion (Chivers  
80 1994, Lambert 1998), the douc shares digestive characteristics with both humans and ruminant  
81 livestock. From a conservation standpoint, it is endangered and fails to thrive in captivity  
82 (Agoramoorthy, Alagappasamy, and Hsu 2004, Nijboer 2006, Power, Toddes, and Koutsos  
83 2012). From a health standpoint, this failure to thrive stems foremost from severe gastrointestinal  
84 disease, which has been shown in other model organisms and humans to be directly associated  
85 with the gut microbiome (Bauchop and Martucci 1968, Edwards, Crissey, and Oftedal 1997,  
86 Ensley et al. 1982, Frank et al. 2007, Ley et al. 2006, Overskei et al. 1994, Zhang et al. 2010).  
87 Further, in contrast to human studies, the genetic background and dietary profiles of NHPs can  
88 be easily and directly ascertained or manipulated, which is critical as both dietary and genetic  
89 factors have been implicated in modulation of the microbiome. The douc thus represents a model  
90 organism whose relevance may span domains of conservation and microbial ecology, and inform  
91 both human and livestock health.

92  
93 Here, by comparing four different populations of the same species along a captivity/wildness  
94 (i.e., lifestyle) gradient, we sought to determine whether such a gradient in lifestyle also  
95 manifests in a gradient of gut microbiota and diet, and to assess whether any such trends  
96 corroborate health status. Furthermore, examining one species living four different lifestyles  
97 allows one to examine the influence of environment independent of interspecific host variation  
98 on shaping gut microbial community structure. As microbes may act as indicators for health of  
99 the host (Frank et al. 2007), these results may allow for the development of predictive  
100 biomarkers to improve NHP health and management. As some microbial trends hold across  
101 species boundaries in other model systems (Anderson et al. 2012, Kohl, Skopec, and Dearing  
102 2014, Roeselers et al. 2011, Wang et al. 2013, Zhao et al. 2013), some biomarkers may translate  
103 to human and ruminant health as well.

104  
105 Here, we focus on a subset of a rich dataset we collected over a two-year period across three  
106 countries, including a comprehensive sampling of the majority of doucs in captivity. Some of  
107 these data have been published previously (Clayton et al. 2016) in a broader meta-analysis  
108 framework, where a putative convergence was observed across various primate species  
109 (including humans) with increasing levels of generalized lifestyle disruption. While the  
110 broadness of such an overview was valuable in demonstrating overall trends across species, it  
111 may also mask intraspecific effects underlying a lifestyle gradient, and also limits the resolution  
112 and interpretability of correlations that can be drawn to specific dietary, health, and lifestyle  
113 components, which themselves may play very different biological roles in the various species

114 under investigation. By focusing in depth on the dietary and microbial facets associated with a  
 115 single species across increasingly unnatural lifestyle conditions, we are powered to make specific  
 116 conclusions relating these covariates in a common context.

117  
 118

119 **METHODS:**

120 **Study site, subjects, and sample material:**

121 Fecal samples (n = 111) were collected opportunistically immediately after defecation from  
 122 captive (n = 12), semi-captive (n = 15), semi-wild (n = 18), and wild (n = 66) red-shanked doucs  
 123 (*Pygathrix nemaeus*) in 2012-2013. The microbiome samples were analyzed previously in a  
 124 meta-analysis examining broader relationships between captivity and the microbiome (Clayton et  
 125 al. 2016). Two captive, seven semi-captive, and eighteen semi-wild red-shanked doucs were  
 126 sampled. Fecal samples (n = 26) were collected from seven known wild individuals. Remaining  
 127 fecal samples (n = 40) collected from the wild population originated from unknown individuals.  
 128 Doucs housed at the Endangered Primate Rescue Center (EPRC) in Ninh Binh, Vietnam served  
 129 as the semi-wild population, as the doucs there live a lifestyle (environment and diet)  
 130 representing an intermediate state between wild and semi-captive. Specifically, these doucs are  
 131 fed exclusively plants, and thus are not offered any supplemental dietary items, such as ripe  
 132 fruits, vegetables, or vitamin supplements, all of which are fed to doucs housed at traditional  
 133 zoological institutions. Doucs housed at the Singapore Zoo served as the semi-captive  
 134 population, as they live a lifestyle (environment and diet) representing an intermediate state  
 135 between semi-wild and captive. Doucs housed at the Philadelphia Zoo served as the captive  
 136 population, as they live in artificial environments compared to their semi-wild and wild  
 137 counterparts. Doucs inhabiting Son Tra Nature Reserve, Da Nang, Vietnam (16°06'—16°09'N,  
 138 108°13'—108°21'E) served as the wild population in this comparative study (Lippold and Thanh  
 139 2008, Ulibarri 2013) (Supplemental Figure 1). Son Tra is located only 10 km from the heart of  
 140 Da Nang City, which is the third largest city in Vietnam. The nature reserve is comprised of  
 141 4,439 total ha and, of those, 4,190 ha is covered by both primary and secondary forests (Lippold  
 142 and Thanh 2008).

143

144 **Supplemental Figure 1. Study site.** Red-shanked doucs (*Pygathrix nemaeus*) inhabiting Son  
 145 Tra Nature Reserve, Da Nang, Vietnam (16°06'—16°09'N, 108°13'—108°21'E) served as the  
 146 wild population for this comparative study (Lippold and Thanh 2008, Ulibarri 2013). Son Tra is  
 147 located only 10 km from the heart of Da Nang City, which is the third largest city in Vietnam.  
 148 The nature reserve is comprised of 4,439 total ha and of those 4,190 ha is covered by both  
 149 primary and secondary forests (Lippold and Thanh 2008). Our study area was approximately 600  
 150 ha and is located on the north central region of the peninsula.

MAP OF SON TRA NATURE RESERVE IN DA NANG CITY

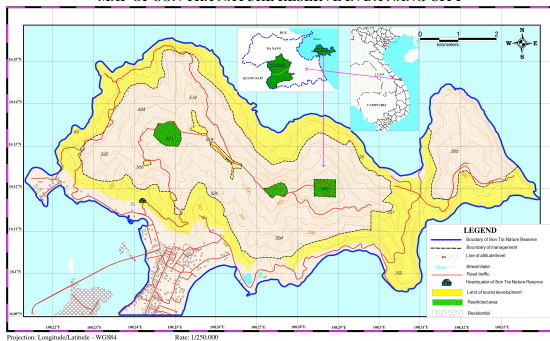

151



152 **Genomic DNA extraction:**

153 Total DNA from each fecal sample was extracted as described with some modifications (Yu and  
154 Morrison 2004). Briefly, two rounds of bead-beating were carried out in the presence of NaCl  
155 and sodium dodecyl sulfate, followed by sequential ammonium acetate and isopropanol  
156 precipitations; precipitated nucleic acids were treated with DNase-free RNase (Roche); and DNA  
157 was purified with the QIAmp® DNA Stool Mini Kit (QIAGEN, Valencia, CA), according to  
158 manufacturer's recommendations. DNA quantity was assessed using a NanoDrop 1000  
159 spectrophotometer (Thermo Fisher Scientific Inc, Massachusetts, USA).

160

161 **Bacterial 16S rRNA PCR amplification and Illumina MiSeq sequencing:**

162 The bacterial 16S rRNA gene was analyzed using primers 515F and 806R, which flanked the V4  
163 hypervariable region of bacterial 16S rRNAs (Caporaso et al. 2012). The oligonucleotide primers  
164 included Illumina sequencing adapters at the 5' ends and template specific sequences at the 3'  
165 ends. The primer sequences were: 515F (forward) 5' GTGCCAGCMGCCGCGGTAA 3' and  
166 806R (reverse) 5' GGACTACHVGGGTWTCTAAT 3' (Caporaso et al. 2012). The 16S rRNA  
167 PCR amplification protocol from the earth microbiome project was used (Gilbert et al. 2010).  
168 Each sample was amplified in two replicate 25- $\mu$ L PCR reactions and pooled into a single  
169 volume of 50  $\mu$ L for each sample. The amplification mix contained 13  $\mu$ L of PCR grade water  
170 (MoBio, Carlsbad, CA), 10  $\mu$ L of 5 PRIME HotMasterMix (5 PRIME, Gaithersburg, MD), 0.5  
171  $\mu$ L of each fusion primer, and 1.0  $\mu$ L of template DNA in a reaction volume of 25  $\mu$ L. PCR  
172 conditions were an initial denaturation at 94°C for 3 m; 35 cycles of 94°C 45 s, 50°C for 60 s,  
173 and 72°C for 90 s; and a final 10 m extension at 72°C. Following PCR, concentration of PCR  
174 products was determined by a PicoGreen assay. Equal amounts of samples were pooled, and size  
175 selection was performed using the Caliper XT (cut at 386 bp +/- 15%). Final quantification was  
176 performed via a PicoGreen assay and assessment on a Bioanalyzer 2100 (Agilent, Palo Alto,  
177 California) using an Agilent High Sensitivity chip. The PCR amplicons were sequenced at the  
178 University of Minnesota Genomics Center (UMGC) using Illumina MiSeq and 2x300 base  
179 paired-end reads (Illumina, San Diego, California).

180

181 **16S Data analysis:**

182 Raw sequences were analyzed with QIIME 1.8.0 pipeline (Caporaso et al. 2010). The  
183 demultiplexed sequences from the UMGc were subjected to the following quality filter: 150 bp  
184 < length < 1,000 bp; average quality score > 25. Preprocessed sequences were then clustered at  
185 97% nucleotide sequence similarity level. For the diversity and taxonomic analyses, the open-  
186 reference-based OTU picking protocol in QIIME was used with GreenGenes 13\_8 as the  
187 reference database (DeSantis et al. 2006) using the USEARCH algorithm (Edgar 2010).  
188 Unmatched reads against the reference database which also did not cluster later in the open  
189 reference pipeline were excluded from the downstream analysis. Read depth was relatively  
190 uniform across lifestyles (Supplemental Figure 2). Taxonomy information was then assigned to  
191 each sequence cluster using RDP classifier 2.2 (Wang et al. 2007). Closed-reference OTUs of  
192 chloroplast origin were filtered out with QIIME, and samples were rarefied to 52,918 reads for  
193 the downstream analysis.

194

195 **Supplemental Figure 2. Read depth following quality control and OTU picking in the (a)**  
196 **closed-reference and (b) open-reference protocols.** Read depth was relatively uniform across  
197 lifestyles in both protocols and highest in the wild population.

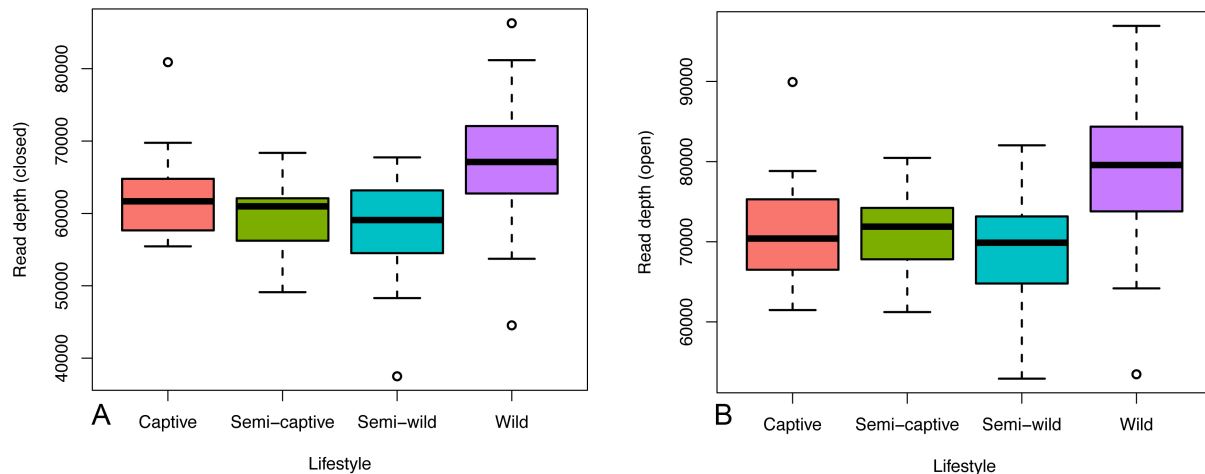

198  
199

200 For the closed-reference-only analyses, including PICRUSt and chloroplast analyses, the raw  
201 FASTQ files were processed with SHI7 (Al-Ghalith et al. 2017), a wrapper script that detected  
202 and removed TruSeq v3 adaptors with trimmomatic (Bolger, Lohse, and Usadel 2014), stitched  
203 the R1 and R2 reads together with FLASH (Magoč and Salzberg 2011), performed quality  
204 trimming from both ends of the stitched reads until a minimum quality score  $\geq 32$  was reached,  
205 and filtered out reads with average quality score  $< 36$ . 88.5% of all original sequences were  
206 retained after QC, resulting in an average read length of 254 bases and average quality score of  
207 37.6. Closed-reference picking was performed at 95% similarity level with the taxonomy-aware  
208 exhaustive optimal alignment program BURST (Al-Ghalith and Knights 2017) against a  
209 database of all RefSeq chloroplast sequences in phyla Chlorophyta (green algae) and  
210 Streptophyta (land plants) as of 06/27/2017, a total of 1,506 chloroplast reference sequences. The  
211 same closed-reference procedure was also used to re-pick OTUs against GreenGenes 13\_8 for  
212 use with PICRUSt, as the latter is reliant on closed-reference GreenGenes IDs for functional  
213 prediction.

214

215 Alpha diversity (including chao1, shannon, and simpson diversity metrics) and beta diversity  
216 analysis (including Bray-Curtis, weighted and unweighted UniFrac metrics) (Lozupone and  
217 Knight 2005), were performed and plotted through a combination of wrapper scripts in QIIME  
218 and custom R scripts using the vegan, ape, ggplot2, and phyloseq packages (McMurdie and  
219 Holmes 2013, Oksanen et al. 2007, Paradis, Claude, and Strimmer 2004, Wickham 2016).  
220 ANOVA was used to assess the statistical significance of alpha diversity variation among  
221 population, and Adonis was used to assess whether populations significantly differed by beta  
222 diversity (Oksanen et al. 2007).

223

224 The functional profiles of the microbial sample were investigated using PICRUSt (Phylogenetic  
225 Investigation of Communities by Reconstruction of Unobserved States) (Langille et al. 2013),  
226 which predicts Kyoto Encyclopedia of Genes and Genomes (KEGG) module abundances within  
227 a microbial community based on 16S rRNA surveys. Within this pipeline, relative abundances of  
228 OTUs were normalized by 16S rRNA copy number, after which centered log ratio  
229 transformation was applied with detection-limit zero replacement. Metagenomic contents were  
230 predicted from the KEGG catalogue (Kanehisa and Goto 2000). The mean Nearest Sequenced  
231 Taxon Index (NSTI) for all lifestyles was below 0.18 (Supplemental Figure 3). To assess degree  
232 of correlation between each functional module and population group ordered by degree of

233 wildness, polyserial correlation was used with ordered lifestyle groups (captive < semi-captive <  
234 semi-wild < wild) via the polycor package (Fox 2007). Statistical significance of this correlation  
235 was ascertained by computing a p-value from the polyserial chi-square rho and degrees of  
236 freedom, followed by Holm family-wise error rate correction ( $\alpha < 0.05$ ). Additionally, the  
237 captive and wild populations were compared pairwise using the non-parametric Wilcoxon Rank-  
238 Sum test followed by Holm adjustment. All associations for which absolute rho < 0.3, adj. p >  
239 0.05, or rho confidence p > 0.05 were considered insignificant.

240

241 **Supplemental Figure 3. The Nearest Sequenced Taxon Index (NSTI) reported by PICRUSt**  
242 **for the lifestyle groups.** The mean NSTI index for all groups was below 0.18, and below 0.165  
243 for all lifestyles except captive. A lower NSTI index means less phylogenetic distance between  
244 the reference genomes used for functional predictions. A value of 0.17 was reported (Langille et  
245 al. 2013) to be a “medium” level of distance, indicating reasonable reliability for the PICRUSt  
246 functional predictions. Interestingly, the captive group showed the highest overall NSTI scores,  
247 potentially indicating a smaller proportion of genomic content in this lifestyle group has been  
248 fully sequenced.

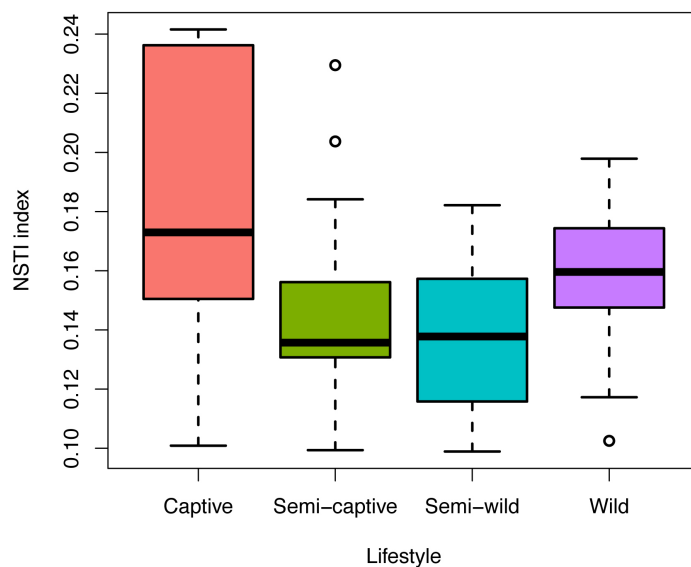

249

250

251 Differential taxon abundance testing was also performed. OTUs were binned additively  
252 according to taxonomy at the genus level (or at lowest characterized level if genus was  
253 uncharacterized for a given OTU). The resulting taxa were then filtered such that only taxa  
254 present in at least 3 samples and with 0.01% average abundance throughout the dataset were  
255 retained, leaving 75 distinct taxa at or below genus level. The OTU table was normalized by  
256 centered log-ratio with least-squares zero interpolation (Templ, Kowarik, and Filzmoser 2011) to  
257 allow for valid compositional covariate testing (Tsilimigras and Fodor 2016). Similarly to the  
258 PICRUSt KEGG module differential abundance testing described above, statistical significance  
259 of association between each taxon and the sample populations was assessed with polyserial  
260 correlation across groups in order of wildness, as well as Wilcoxon rank-sum tests of the two  
261 extrema (captive vs wild lifestyles), followed by Holm adjustment. All associations for which  
262 absolute rho < 0.3, adj. p > 0.05, or rho confidence p > 0.05 were considered insignificant. For

263 heatmaps, only features with absolute  $\rho > 0.6$ , adj.  $p < 0.05$ , and  $\rho$  confidence  $p < 0.05$  are  
264 displayed for clarity.

265

### 266 **Data deposition:**

267 All sequencing data are deposited at the European Bioinformatics Institute under project number  
268 PRJEB11414. Additionally, all R code and raw non-sequence data used for these analyses is  
269 freely available on the project GitHub site located at [https://github.com/jbclayton83/douc-](https://github.com/jbclayton83/douc-microbes-paper)  
270 [microbes-paper](https://github.com/jbclayton83/douc-microbes-paper).

271

### 272 **Analysis of diet components**

273 One population of wild doucs was observed between January and August 2013 in Son Tra  
274 Nature Reserve, Danang, Vietnam. All occurrences of observed feeding behaviors were  
275 recorded. Identified plant parts ingested were recorded and reachable feeding trees were marked.  
276 The plant parts of specific trees which were prevalent in their diet and were available in  
277 sufficient quantities were sampled and dried to 95% dry matter as per a previously established  
278 method (Barnett 1995). Samples were sent to the Biochemical Lab at The Agriculture and  
279 Forestry University in Ho Chi Minh City, Vietnam, for chemical analysis. Concentrations of  
280 crude protein, simple sugars, crude fiber, calcium, sodium, manganese, potassium and iron were  
281 determined on a dry matter basis, all of which follow AOAC methods 920.152, 973.18C, and  
282 974.06 (AOAC 2012). Additionally, all plants fed to semi-wild doucs during a two week period  
283 in October 2012 were also sent for chemical analysis for comparison. Chemical compositions of  
284 semi-captive and captive diets were also analyzed. Nutrients were compiled from the laboratory  
285 results on a concentration per dry matter basis. Wild and semi-wild nutrient contents were  
286 constructed by observed frequency. Semi-captive and captive nutrient contents were assembled  
287 purely from diets as given to their specimens.

288

289

## 290 **RESULTS:**

### 291 **Microbiome diversity declines according to lifestyle and habitat disruption**

292 Fecal microbiome diversity showed a steady decline from wild towards captive environments, as  
293 we described previously (Clayton et al. 2016). The number of OTUs in the doucs decreased in a  
294 gradient-like fashion with the highest number in wild doucs ( $4231.68 \pm 584.37$  OTUs), and the  
295 lowest number in captive doucs ( $2332.08 \pm 180.30$  OTUs). Consistent with the gradient  
296 hypothesis, the semi-wild doucs ( $2845.50 \pm 494.98$  OTUs) and semi-captive doucs ( $2696.93 \pm$   
297  $417.00$  OTUs) were intermediate. Pairwise comparison of all populations by OTU abundance  
298 showed statistically significant differences in OTU count biodiversity between all groups ( $p <$   
299  $0.01$ ) (Figure 1a). In addition to investigating overall OTU diversity (i.e., number of OTUs)  
300 amongst the four unique douc populations, other alpha diversity (i.e., within-sample diversity)  
301 metrics were calculated. The mean Shannon diversity index, which measures species evenness,  
302 was highly significant across the four douc populations (wild:  $7.86 \pm 0.34$ ; semi-wild:  $7.07 \pm$   
303  $0.55$ ; semi-captive:  $7.11 \pm 0.53$ ; captive:  $6.65 \pm 0.53$ ; ANOVA,  $p=4.3 \times 10^{-18}$ ). Based on the  
304 calculated Shannon diversity indices, the wild douc microbiome was the most even of the four  
305 douc populations (Figure 1b).

306

307

308

309 **Figure 1. Diminished alpha diversity in red-shanked douc microbiomes across lifestyles.**  
 310 Violin plots of gut microbial alpha diversity across the 4 lifestyles according to (a) the number  
 311 of species-like operational taxonomic units (OTUs) generated by open-reference OTU picking in  
 312 the gut microbiome, and (b) the Shannon diversity index. The width of the shape corresponds to  
 313 the distribution of samples (strips overlaid as strip chart), and asterisks denote significant  
 314 differences at  $p < 0.05$  (\*),  $p < 0.01$  (\*\*), and  $p < 0.001$  (\*\*\*). Under both metrics, the wild  
 315 population exhibits the highest biodiversity, which appears to diminish as a gradient with level of  
 316 captivity to the captive population, which has the lowest.

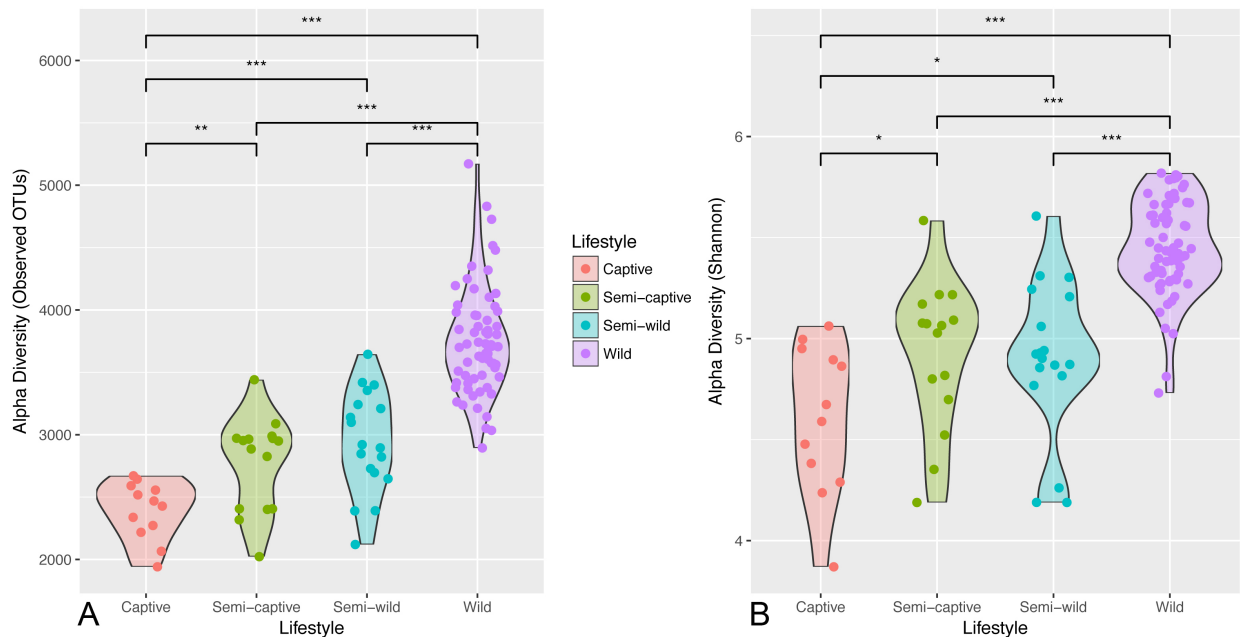

317  
 318  
 319 Beta diversity calculations were performed to assess whether significant differences between  
 320 populations were present, using unweighted UniFrac distance (Figure 2), as well as the weighted  
 321 UniFrac and non-phylogenetic Bray-Curtis metrics (Supplemental Figure 4). Analysis of  
 322 unweighted UniFrac distance measurements is most effective at detecting differences in  
 323 community membership when considering abundance differences among rare taxa (Chen et al.  
 324 2012). An Adonis test on unweighted UniFrac distances revealed that fecal microbiome grouped  
 325 statistically by douc population (Adonis  $p = 0.001$ ), suggesting that each douc population had a  
 326 unique microbiome. It also suggests that lifestyle has a major influence on gut microbial  
 327 community structure, as doucs living under the most unnatural conditions had gut microbiomes  
 328 most disparate from free-living wild doucs. Overall, the results of our beta diversity analyses  
 329 indicated that microbiome composition was distinct for each of the four douc populations  
 330 examined in this study at the 97% OTU and genus levels. Further, Figure 2 reveals a clear  
 331 gradient by naturalness of lifestyle along PC1, the primary axis of differentiation.  
 332

333 **Figure 2. Principal coordinates plot showing (a) unweighted UniFrac ordination and (b)**  
 334 **box plot of PC1 by population showing ecological distance between gut microbial**  
 335 **communities in wild, semi-wild, semi-captive, and captive red-shanked doucs.** All samples  
 336 were obtained with the same protocol for V4 16S rRNA sequencing, and open-reference OTU  
 337 picking was used. Douc microbiomes clearly clustered by population suggesting that each douc  
 338 population had a unique microbiome, and thus were highly distinctive. Lifestyle has a major



339 influence on gut microbial community structure, as doucs living under the most unnatural  
340 conditions (captive) had gut microbiomes most disparate from wild doucs (i.e., natural).

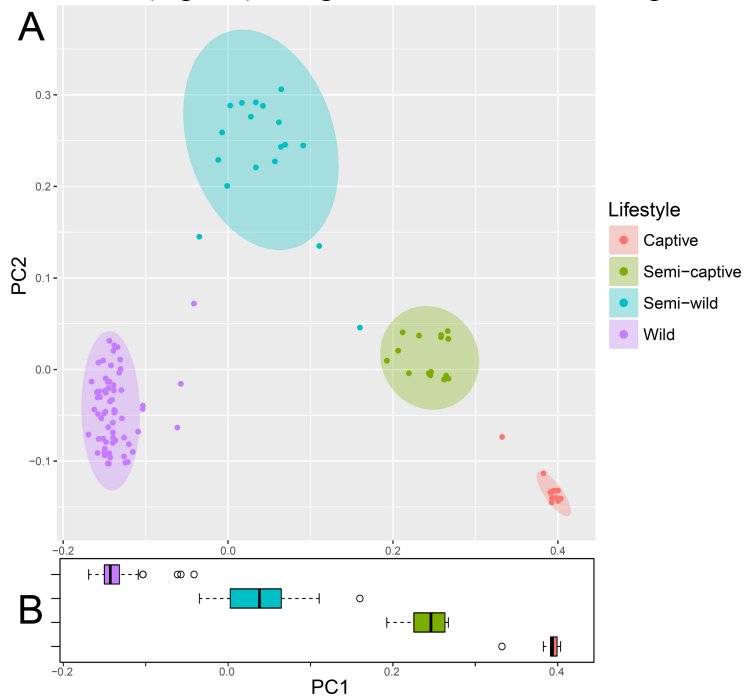

341  
342  
343

344 **Supplemental Figure 4. Principal coordinates plot of (a) weighted UniFrac and (b) Bray-**  
345 **Curtis metrics showing ecological distance between gut microbial communities in wild,**  
346 **semi-wild, semi-captive, and captive red-shanked doucs.** All samples were obtained with the  
347 same protocol for V4 16S rRNA sequencing, and open-reference OTU picking was used. Douc  
348 microbiomes clearly clustered by population suggesting that each douc population had a unique  
349 microbiome, and thus were highly distinctive from one another.

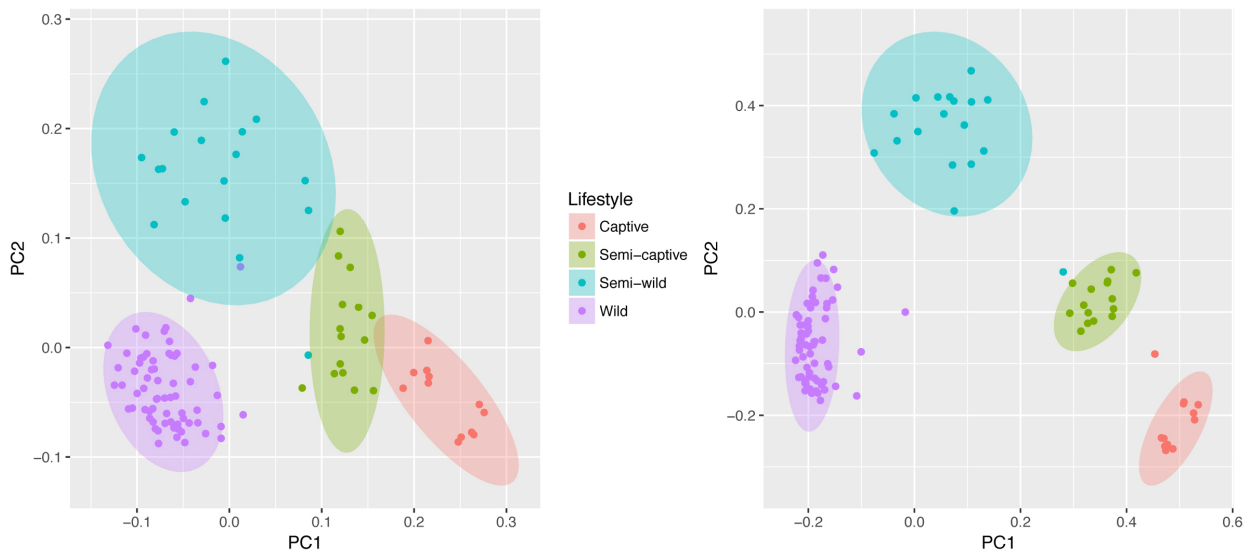

350  
351  
352

## 353 Differential taxonomic abundance analysis by lifestyle

354 Broad phylum-level taxonomic summarization revealed trends among the fecal microbiomes of  
355 the four douc populations included in this study. The fecal microbiomes of wild, semi-wild,  
356 semi-captive, and captive doucs were dominated by the phylum Firmicutes. Bacteroidetes was  
357 found in very low abundance in both the wild and semi-wild populations. In contrast,  
358 Bacteroidetes was the second most abundant phylum found in both the semi-captive and captive  
359 populations. Additionally, Verrucomicrobia was much more abundant in the semi-wild fecal  
360 microbiome than the other lifestyles examined (Supplemental Figure 5; Supplemental Figure 6).  
361 *Bacteroides* and *Prevotella*, as well as *Methanosphaera*, *CF231*, *Treponema*, and *YRC22* were  
362 highly positively correlated with captivity level (all polyserial rho  $\geq 0.71$ ,  $p < 1 \times 10^{-6}$ ) (Figure 3;  
363 Figure 4; Supplemental Figure 6; Supplemental Table 1). Conversely, *Adlercreutzia*,  
364 *Anaerostipes*, *Blautia*, *Campylobacter*, *Dehalobacterium*, *Dorea*, and *Oscillospira* were much  
365 less abundant with increasing captivity (all polyserial rho  $\leq -0.65$ ,  $p < 1 \times 10^{-6}$ ) (Figure 3; Figure  
366 4; Supplemental Figure 6; Supplemental Table 1). Although the genus *Akkermansia* shows a  
367 similar trend (polyserial rho =  $-0.57$ ,  $p = 1.29 \times 10^{-09}$ ), its abundance peaks slightly in the semi-  
368 wild population (Figure 3; Figure 4; Supplemental Figure 6).

370 **Supplemental Figure 5. Heatmaps of differentially abundant microbial taxa at the phylum**  
371 **and order levels in red-shanked doucs living four distinct lifestyles.** Taxa are displayed with  
372 polyserial correlations (rho) above 0.3, rho estimate adjusted  $p < 0.05$ , and (pairwise) Wilcoxon  
373 rank-sum adjusted  $p$ -value for wild and captive lifestyles  $< 0.05$ . Color represents intensity of  
374 centered log ratio abundances along gradient of color scale shown, at a) phylum and b) order  
375 levels of taxonomy.

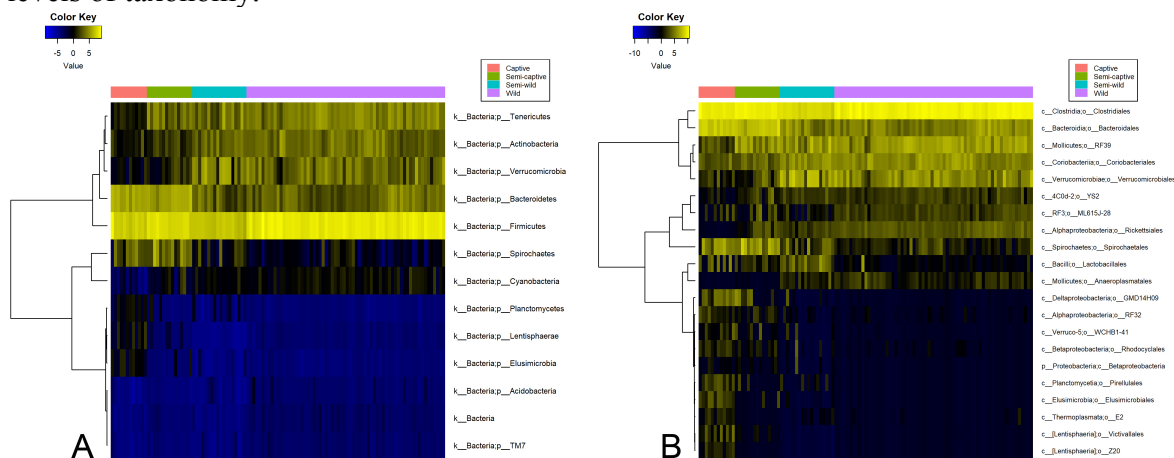

376  
377  
378

379 **Supplemental Figure 6. Stacked bar plots of microbial taxa relative abundance ordered by**  
380 **taxonomic level (phylum, order, and genus) in wild, semi-wild, semi-captive, and captive**  
381 **red-shanked doucs.** All samples were obtained with the same open-reference V4 16S rRNA  
382 protocol. Up to 25 taxa (including a group for “Other”) are displayed. Taxa were prioritized for  
383 display according to highest groupwise maximum abundance, and ordered for display by average  
384 abundance throughout the dataset from top to bottom. For display purposes, the square root  
385 transformation of the abundance is shown rather than the absolute relative abundance to allow  
386 for easier visual inspection and comparison of lower-abundance community members. Legends  
387 show the known taxonomic rank of each taxon in the graph; colors may not be consistent

388 between graphs. Microbes that could not be classified to the specified level are also included at  
 389 the highest level at which they could be classified.

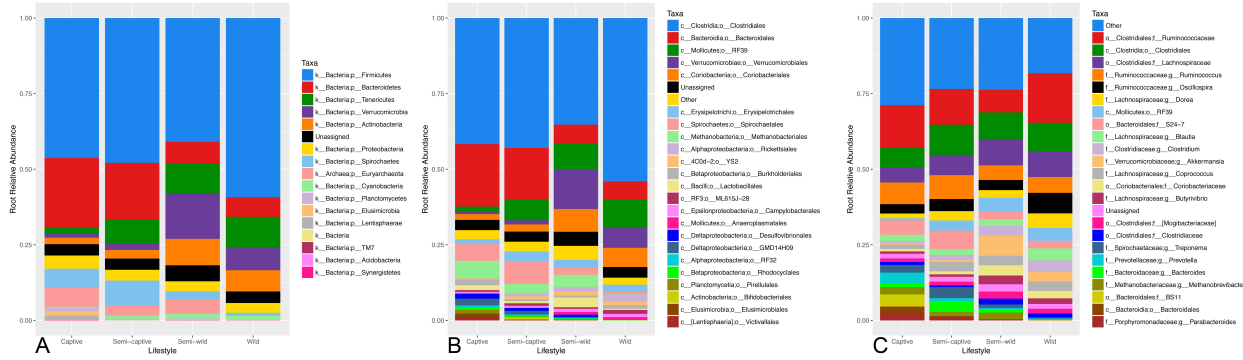

390  
 391  
 392  
 393  
 394 **Figure 3. Heatmaps of differentially abundant microbial taxa at the genus level in red-**  
 395 **shanked doucs living four distinct lifestyles. Taxa are displayed with polyserial correlations**  
 396 **(rho) above 0.3, rho estimate adjusted p < 0.05, and (pairwise) Wilcoxon rank-sum adjusted p-**  
 397 **value for wild and captive lifestyles < 0.05. Color represents intensity of centered log ratio**  
 398 **abundances along gradient of color scale shown.**

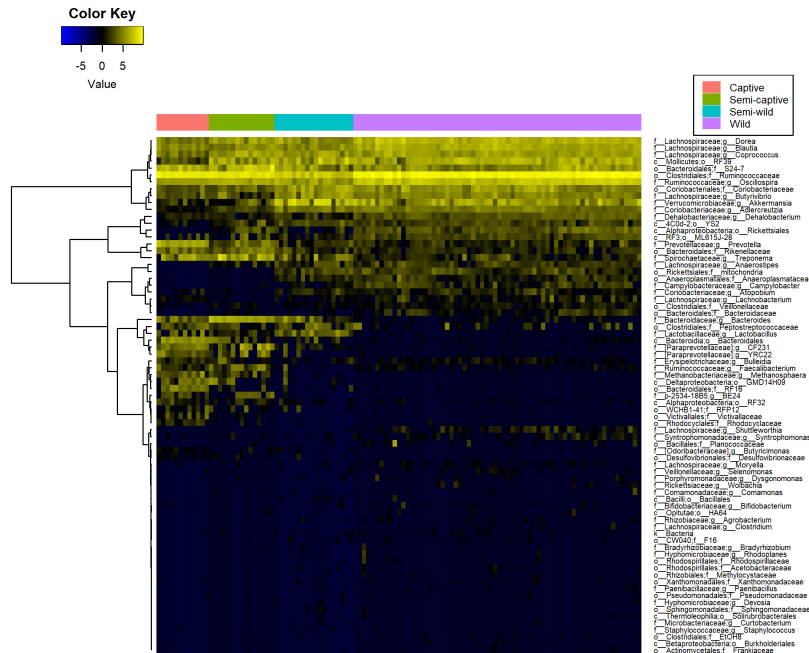

399  
 400  
 401  
 402 **Figure 4. Beeswarm plots displaying gradient-like patterns of selected microbial taxa. A**  
 403 **beeswarm plot of the arcsine square root relative abundance of bacterial genera *Bacteroides*,**  
 404 ***Prevotella*, *Oscillospira*, *Blautia*, and *Akkermansia* shown in wild, semi-wild, semi-captive, and**  
 405 **captive douc populations. All samples were obtained with the same protocol for V4 16S rRNA**  
 406 **sequencing, and open-reference OTU picking was used. Red-shanked doucs acquire *Bacteroides***

407 and *Prevotella*, and lose *Oscillospira*, *Blautia*, and *Akkermansia* in captivity. The presence of  
408 *Akkermansia* was most associated with a semi-wild lifestyle.

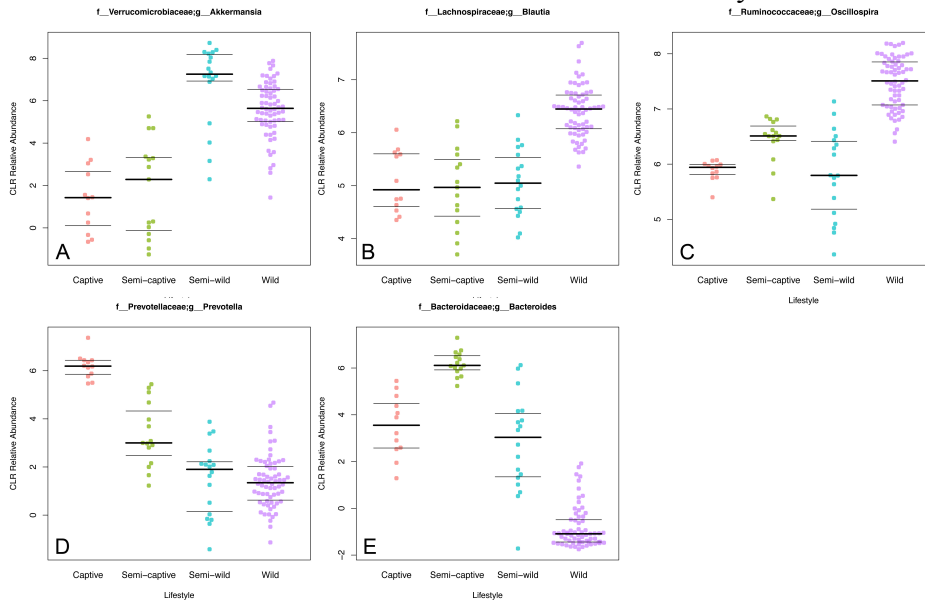

409  
410 A full-rank, species-level, plant-inclusive heatmap was also generated under more stringent taxa  
411 selection criteria (absolute polyserial rho > 0.45, pairwise p < 0.01) but with sample (column)  
412 clustering also performed to ascertain whether hierarchical clustering of these taxa abundance  
413 profiles alone would be able to recover a similar separation between lifestyles as observed in the  
414 Unweighted UniFrac ordination. The unsupervised clustering of these features correctly  
415 recovered the group membership of all samples, as observed by the preservation of the sample  
416 group labels without gaps or shuffling between lifestyles (Supplemental Figure 7a). With even  
417 more stringent selection criteria (polyserial rho > 0.75, pairwise p < 0.001), there is some overlap  
418 of samples between neighboring lifestyle groups along the gradient; specifically, it appears as if  
419 some members of the “Semi-wild” group have mingled with the adjacent “Semi-captive” and  
420 “Wild” groups along the gradient, but the overall trend remains apparent even with only 16 taxa  
421 (Supplemental Figure 7b).

422  
423 **Supplemental Figure 7. Biclustering of significantly differentiated taxa recapitulates group**  
424 **separation by lifestyle.** Heatmaps at different levels of significance were generated using all of  
425 the statistically significant finest-grain features available in the data (up to the order level in  
426 plants and species level in prokaryotes). Biclustered heatmaps were generated with the following  
427 taxa selection criteria: (a) polyserial rho > 0.45 and captive-wild adj. Wilcoxon p < 0.01 (84 taxa  
428 selected); and (b) polyserial rho > 0.75 and Wilcoxon p < 0.001 (16 taxa selected). Both  
429 heatmaps were subjected to unsupervised complete linkage clustering of correlation dissimilarity  
430 [1 - cor()], revealing that the correlation patterns of top differentiated taxa alone is sufficient to  
431 nearly completely recover lifestyle group membership of the samples. Further, increasing  
432 stringency of the selection criteria as in (b) resulted in limited blurred membership between  
433 adjacent lifestyle wildness categories only. This highlights the potential utility of these taxa as  
434 biomarkers in this population, as well as efficacy of the gradient-informed criteria used in their  
435 selection.

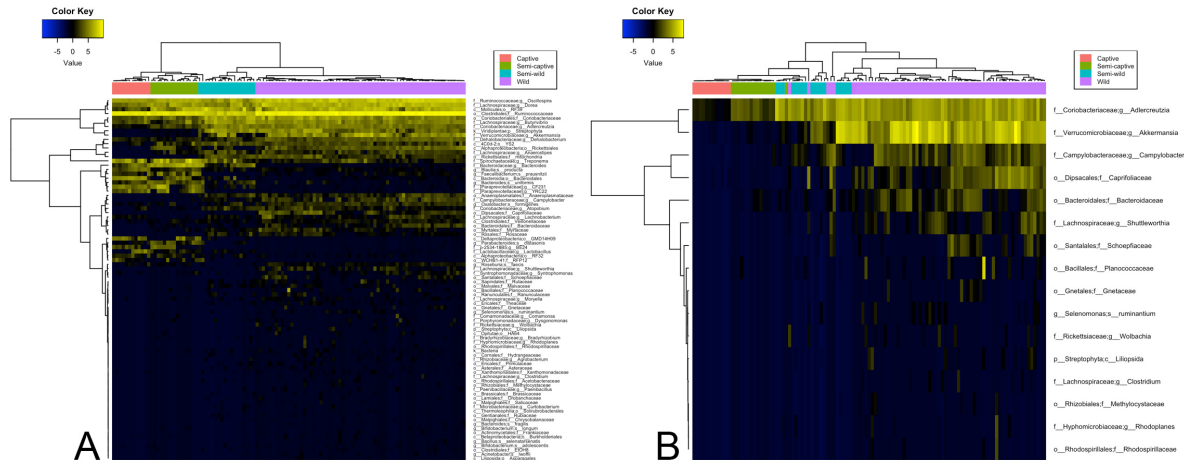

436  
437

438 In addition to examining relative abundances of bacterial taxa between douc groups, we  
439 calculated and compared the log *Firmicutes* to *Bacteroidetes* ratio for each douc group  
440 (Supplemental Figure 8). The log of the *Firmicutes* to *Bacteroidetes* (F:B) ratio, which has been  
441 suggested as a measure of energy harvest capacity by microbial communities (Ley et al. 2006,  
442 Turnbaugh et al. 2009, Turnbaugh et al. 2006), was higher in the wild population than in the  
443 semi-wild, semi-captive, and captive populations ( $4.64 \pm 0.94$ ;  $3.78 \pm 1.14$ ;  $1.94 \pm 0.81$ ;  $1.43 \pm$   
444  $0.50$ , respectively). A Kruskal-Wallis test indicated there is a significant difference in F:B ratio  
445 between at least one lifestyle group and the others. Pairwise significance between specific  
446 groups, with the exception of captive versus semi-captive (Wilcoxon rank-sum  $p = 0.05$ ), were  
447 significantly different from one another for all lifestyle pairs with  $p < 0.01$ . In fact, there appears  
448 to be a relationship between lifestyle and the F:B ratio, as we see the highest ratio in wild doucs,  
449 the second highest ratio in the semi-wild doucs, the third highest ratio in semi-captive doucs, and  
450 finally the lowest ratio in captive doucs (Supplemental Figure 8).

451

452 **Supplemental Figure 8. Firmicutes to Bacteroidetes ratio in red-shanked douc microbiomes**  
453 **across populations.** Bar plots of *Firmicutes* to *Bacteroidetes* ratio, a measure of energy harvest  
454 capacity by microbial communities, plotted by wild, semi-wild, semi-captive, and captive  
455 populations of red-shanked doucs. All samples were obtained with the same protocol for V4 16S  
456 rRNA sequencing, and open-reference OTU picking was used. The *Firmicutes* to *Bacteroidetes*  
457 ratio was highest in wild doucs ( $4.64 \pm 0.94$ ), followed by the semi-wild doucs ( $3.78 \pm 1.14$ ),  
458 semi-captive ( $1.94 \pm 0.81$ ), and captive doucs ( $1.43 \pm 0.50$ ). A significant decrease in  
459 *Firmicutes* to *Bacteroidetes* ratio from the wild population to the semi-wild population, from  
460 semi-wild to the semi-captive population, and again from the semi-captive population to the  
461 captive population is visible. Pairwise Wilcoxon rank-sum p-values for the populations are:  
462 captive vs semi-captive  $p = 0.052858$ , captive vs semi-wild  $p = 4.62464e-08$ , captive vs wild  $p =$   
463  $4.320356e-08$ , semi-captive vs semi-wild  $p = 5.177609e-06$ , semi-captive vs wild  $p = 6.900029e-$   
464  $09$ , semi-wild vs wild  $p = 0.006974937$ .



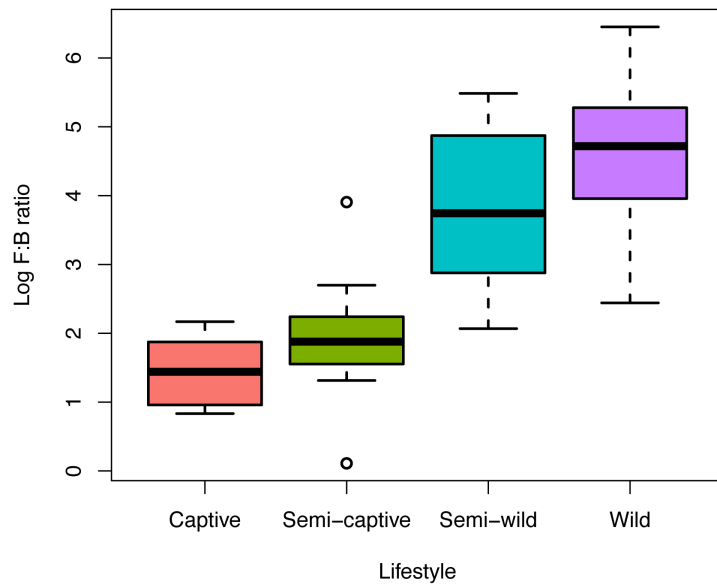

465  
466

#### 467 **Red-shanked douc metagenome: Functional analysis using PICRUST**

468 The functional profiles of the microbial sample in this study were investigated employing  
469 PICRUST. In captivity, we observed a general trend toward increased protein metabolism at the  
470 expense of fatty acid metabolism. Specifically, the KEGG Ortholog (KO) super-heading “Amino  
471 acid metabolism” was highly correlated with captivity status (polyserial rho = 0.85,  $p = 2.2 \times 10^{-11}$ ),  
472 and the super-heading “Lipid metabolism” was highly anticorrelated (polyserial rho = -0.89,  
473  $p = 7.3 \times 10^{-12}$ ). Perhaps due to the presence of chloroplasts in the closed-reference data used for  
474 PICRUST analysis, the photosynthesis and antenna proteins pathway was downregulated in  
475 captivity, but the porphyrin and chlorophyll metabolism pathway was upregulated. With the  
476 exception of tetracycline biosynthesis, antibiotics-related pathways, including vancomycin  
477 biosynthesis, beta-lactam resistance, and penicillin & cephalosporin biosynthesis, were positively  
478 associated with captivity. Certain xenobiotic (mainly industrial pollutants) degradation pathways  
479 were positively associated with captivity, including ethylbenzene, styrene, and toluene. Other  
480 xenobiotic pathways (such as plant toxins and wartime chemicals) were negatively associated  
481 with captivity, including xylene, dioxins, atrazine, and chloroalkanes & chloroalkenes. Lastly,  
482 chemotaxis, invasion, flagellar assembly, and cytoskeleton genes were enriched in wild doucs.  
483 All p-values for results in this paragraph were less than  $< 1 \times 10^{-2}$  (Figure 5; Supplemental Table  
484 2).

485

486 **Figure 5. Heatmap of KEGG level 3 metabolic pathways in red-shanked douc groups living**  
487 **four distinct lifestyles.** Pathways are displayed with polyserial correlations (rho) above 0.75, rho  
488 estimate adjusted  $p < 0.05$ , and (pairwise) Wilcoxon rank-sum adjusted p-value for wild and  
489 captive lifestyles  $< 0.05$ . Color represents intensity of unit-normalized centered log ratio  
490 abundances along gradient of color scale shown.

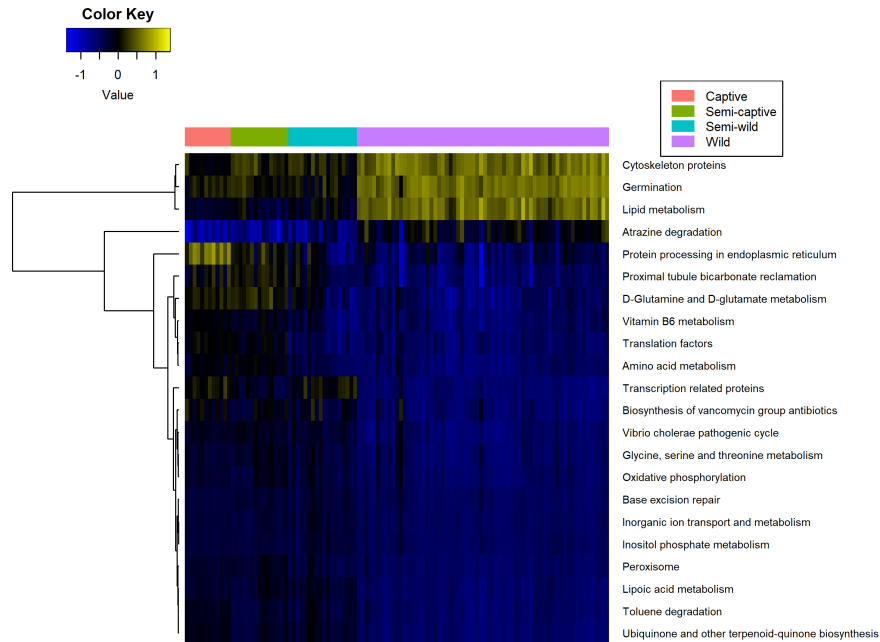

491  
492

### 493 **Composition of douc diets**

494 The diets of the douc populations were compared to determine what factors, if any, could have  
495 contributed to the differences in microbiome composition observed (Table 1). Wild doucs fed on  
496 57 different plant species. Sixty-one percent of all identified plant parts observed being ingested  
497 were collected and chemically analyzed. The semi-wild douc population were offered 60 plant  
498 species over the course of one year, 16 of which were never consumed (Otto 2005). In contrast to  
499 the high diet diversity (i.e., number of plant species) consumed by the wild and semi-wild doucs,  
500 the semi-captive and captive doucs consumed a much less diverse diet. Specifically, the semi-  
501 captive doucs were presented with approximately 15 plant species and the captive douc diet only  
502 contained one plant species (Clayton et al. 2016) (Figure 6a). The semi-wild population was  
503 observed feeding on 35 different plant genera over one year, and the wild population was  
504 observed feeding on 41 different plant genera over approximately seven months. While nine  
505 genera were observed being ingested by both the wild and semi-wild populations, only five  
506 genera were ingested by both semi-wild and semi-captive doucs. Of the five genera, only one  
507 was ingested by wild, semi-wild, and semi-captive doucs. The single plant species consumed by  
508 the captive doucs was also consumed by the semi-captive doucs (Figure 6b; Table 2).

509

### 510 **Figure 6. Plant diversity in red-shanked douc diet reflects dietary diversity across**

511 **populations.** (a) Bar plots of dietary biodiversity, as measured by the number of plant species  
512 consumed by wild, semi-wild, semi-captive, and captive populations of red-shanked doucs. Wild  
513 doucs feed on 57 different plant species, whereas the semi-wild doucs feed on 44 different plant  
514 species annually (Clayton 2015, Otto 2005). In contrast to the high dietary diversity consumed  
515 by the wild and semi-wild doucs, semi-captive and captive doucs are fed far fewer plant species.  
516 Specifically, semi-captive doucs are fed on approximately 15 plant species and the captive  
517 doucs are fed single plant species (Clayton 2015). (b) Venn diagram depicting the number of  
518 plant genera consumed by the wild, semi-wild, semi-captive, and captive douc populations, while  
519 the numbers in overlaps representing the genera eaten by the constituent populations. Number of

520 genera for the wild population was obtained from Clayton (unpublished). Number of genera for  
 521 the semi-wild population was obtained from a combination of Clayton (unpublished) and Otto  
 522 (2005).

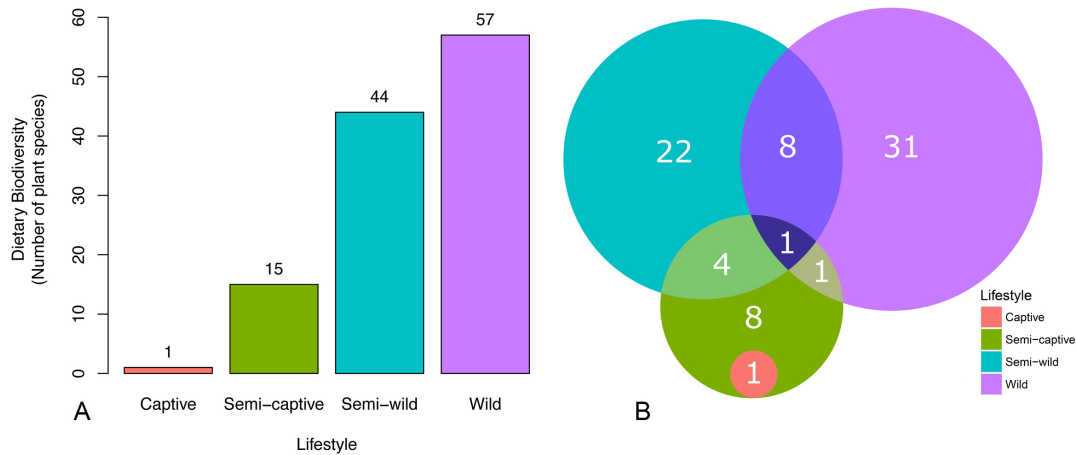

523 We estimated total raw plant dietary content for the four douc populations, using chloroplast  
 524 sequences observed in the 16S amplicon sequencing data. We found that chloroplast content was  
 525 substantial in wild and semi-wild populations, but that chloroplast content decreased  
 526 dramatically in semi-captive and captive doucs (Figure 7a). Alignment of the 16S sequences to  
 527 known plant reference genomes at 95% identity yielded a heatmap similar to Supplemental  
 528 Figure 5b. Overall, there is a clear trend toward increased plant abundances in the semi-wild and  
 529 wild lifestyles, although certain orders display different abundances between lifestyle groups.  
 530 Some orders can be seen to overlap between lifestyles, while others do not (Figure 7b;  
 531 Supplemental Table 3).

532 **Figure 7. Plant chloroplast material in douc feces increases with wildness of lifestyle.**  
 533 (A) Centered-log-ratio-corrected relative abundance beeswarm plot. (B) Heatmap of class/order-  
 534 level representation of plant taxa by lifestyle. All land plants (phylum Streptophyta) for which  
 535 refseq chloroplast sequences were available were searched for matches with the 16S data. There  
 536 is trend toward increased plant matter with wildness (polyserial rho = -0.81, pairwise wild-  
 537 captive Wilcoxon rank-sum adjusted  $p = 8.65 \times 10^{-13}$ ). Certain plant taxa display different patterns  
 538 of overlapping abundance between lifestyles.

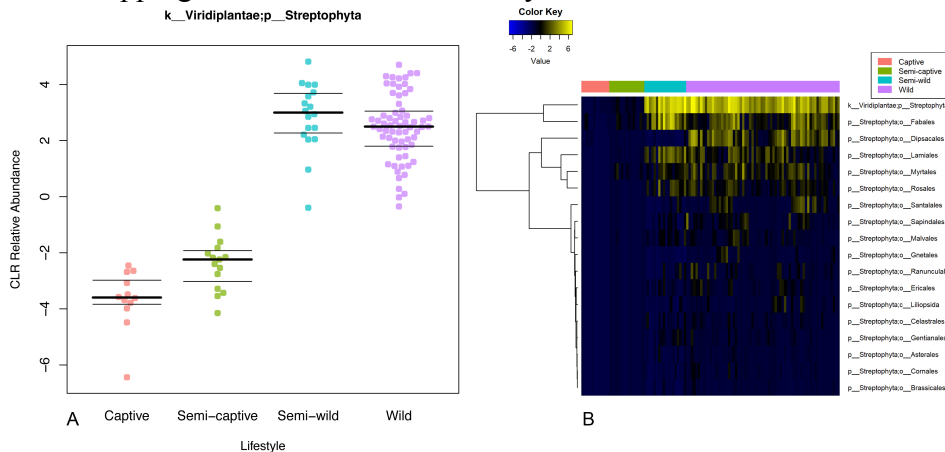

542

543 Nutritional composition of food items included in wild, semi-wild, semi-captive, and captive  
544 douc diets differed. Specifically, the crude protein concentration of the semi-wild, semi-captive,  
545 and captive douc diets was higher than that of the wild douc diet. The wild and semi-wild douc  
546 diets contained much more Acid Detergent Fiber (ADF) and Neutral Detergent Fiber (NDF) than  
547 did the semi-captive and captive diets. We examined the four douc diets for differences in  
548 amount of three macrominerals, including calcium, potassium, and sodium. Of the diets  
549 examined, the semi-wild douc diet contained more calcium than did the wild, semi-captive, and  
550 captive douc diets. Additionally, the diet consumed by wild doucs contained more potassium  
551 than did the diets consumed by semi-wild, semi-captive, or captive doucs. The diets of semi-wild  
552 and wild doucs contained considerably less sodium than the semi-captive and captive doucs. The  
553 semi-wild douc diet contained more iron and zinc than the wild, semi-captive, or captive diets.  
554 The concentration of sugar was not available for all lifestyle groups. The captive douc diet had  
555 the highest amount of soluble sugars compared to wild and semi-wild diets (Table 3).  
556

557

## 558 **DISCUSSION:**

559 In this study, the red-shanked douc was used as a model system to study the relationships  
560 between dietary composition and microbial composition and function within the gastrointestinal  
561 tract. Doucs are folivorous Old World monkeys, that are anatomically, physiologically, and  
562 ecologically unique amongst the living primates (Davies and Oates 1994). They possess  
563 specialized GI systems similar to ruminants, allowing for the digestion and utilization of  
564 extremely high fiber diets (Chivers 1994, Lambert 1998). For doucs, mutualistic microbial  
565 populations are indispensable to digestive processes such as the fermentation of polysaccharides  
566 and subsequent production of short-chain fatty acids (Jablonski 1998, Nijboer et al. 2006,  
567 Nijboer, Clauss, and Olsthoorn 2006). Although the digestive specializations possessed by doucs  
568 have allowed them to thrive in their native habitat, the same specializations appear to challenge  
569 their survival in captivity, as they are highly susceptible to gastrointestinal disorders when  
570 maintained on commercially prepared diets in captive situations (Agoramoorthy, Alagappasamy,  
571 and Hsu 2004, Nijboer 2006, Power, Toddes, and Koutsos 2012). We hypothesized that specific  
572 and unique microbial subsets play a critical role in the utilization of fibrous vegetation with  
573 natural toxicants, and that captive doucs lack the microbiota to maintain optimal health due to  
574 inadequate dietary substrate. In order to better understand the link between lifestyle, gut  
575 microbial communities, and health, we examined the fecal microbiomes of four douc populations  
576 living four distinct lifestyles (wild, semi-wild, semi-captive, and captive).  
577

578

## 578 **Microbial diversity**

579 Studies have shown that present-day (i.e., modern) humans have lost a considerable portion of  
580 their natural (i.e., historical) microbial diversity (Clemente et al. 2015, Martinez et al. 2015,  
581 Moeller et al. 2014). Reduced bacterial diversity is often viewed as a negative indicator of health  
582 (Fujimura et al. 2010). 16S rRNA sequencing results revealed that captive doucs had a marked  
583 reduction in gut bacterial alpha diversity when compared to wild and semi-wild doucs, as we  
584 reported recently (Clayton et al. 2016). Considering that doucs often fail to thrive in captivity,  
585 this was a salient finding. Not only was a reduction in diversity detected in captive doucs, but a  
586 gradient-like decrease in diversity related to lifestyle was observed, as the level of diversity  
587 observed in the semi-wild doucs was intermediate between wild and semi-captive doucs, and the  
588 level of diversity seen in semi-captive doucs was intermediate between semi-captive and captive

589 doucs. This trend is consistent between metrics of richness and evenness, and suggest that  
590 lifestyle factors, especially dietary composition, and gut bacterial diversity are interrelated for  
591 doucs. This is similar to what has been shown in humans and other organisms (Clemente et al.  
592 2015).

593  
594 Beta-diversity metrics revealed each douc population had a unique microbiome. Weighted  
595 UniFrac ordination, although maintaining clear group separation, did not recover a clear  
596 gradient, whereas Bray-Curtis appears similar to Unweighted UniFrac in visibly resolving the  
597 lifestyle gradient with PC1. This implies that the taxonomic membership of the gut microbiome,  
598 more than the abundance of each member, plays a dominant role in uncovering the gradient  
599 between lifestyles. Moreover, tree-independent unsupervised hierarchical clustering, utilizing  
600 only the taxonomic features significantly correlated to lifestyle gradient, preserved lifestyle  
601 group membership without erroneously assigning any samples to the wrong lifestyle groups, and  
602 found further structure within each group. This highlights the potential for using these taxa, or a  
603 subset thereof, as biomarkers capable of accurately differentiating between lifestyles.

604

### 605 **Lifestyle and diet drive gut microbial community structure**

606 Establishing a link between diet and the microbiome was a major focal point of this study. GI  
607 microbiome composition is shaped by host genetics and environment, among many factors  
608 (David et al. 2014, Goodrich et al. 2014). Examining four populations of the same NHP species  
609 living in four very different environments enabled assessment of the contribution of  
610 environmental factors independent of interspecific host variation towards shaping the  
611 microbiome. The major environmental differences to which each douc population is exposed,  
612 such as climate and diet, suggest that environment plays a fundamental role in shaping gut  
613 microbiome composition in wild and captive NHPs. Of the environmental factors that contribute  
614 to the establishment and maintenance of the gut microbiota, diet is likely the most influential, as  
615 studies have shown that changes in diet are directly associated with shifts in gut microbial  
616 community structure (David et al. 2014, Gophna 2011, Muegge et al. 2011, Wu et al. 2011, Xu  
617 and Knight 2015). Examples exist of species adapting to specific dietary niches in both wild  
618 (Amato et al. 2014) and captive (Kohl, Skopec, and Dearing 2014) settings via changes in their  
619 gut microbiota.

620

621 Many of our results suggest the existence of a relationship between microbiome composition and  
622 dietary patterns. The relative abundance of select bacterial genera, *Bacteroides*, *Prevotella*,  
623 *Oscillospira*, and *Blautia*, and differences in dietary composition between lifestyles, warrant  
624 specific discussion in this regard. *Prevotella*, which is involved in the digestion of simple sugars  
625 and carbohydrates (Purushe et al. 2010), was notably higher in the captive doucs than in the other  
626 three douc populations examined. One very different component in the diets of wild versus  
627 captive doucs is the inclusion of produce in the captive diets. Fruits consumed by captive  
628 primates have much different nutrient profiles than fruits consumed by wild primates (Ofstedal  
629 and Allen 1996). They have been cultivated for human consumption to be lower in fiber and  
630 protein and higher in sugar as opposed to wild fruits which are, in general, the exact opposite  
631 (Schwitzer and Kaumanns 2003). Given the diet of captive doucs contained more than a  
632 threefold increase in the percentage of sugars compared to wild and semi-wild douc diets, there  
633 seems to be a clear relationship between sugar consumption and *Prevotella* abundance. Unlike  
634 captive doucs, wild doucs consumed unripe fruit, which is drastically different than ripe fruit fed



635 to captive individuals, and thus its impact on the douc microbiome is different than cultivated  
636 fruits would have. The low relative abundance of *Prevotella* in the wild douc microbiome  
637 provides further evidence that diet is a major driver of microbiome composition.  
638

639 Semi-captive and captive doucs also harbored more *Bacteroides* than semi-wild or wild doucs. In  
640 humans, *Bacteroides* are found in higher abundance in individuals who consume diets high in fat  
641 and protein (Wu et al. 2011, Yatsunenکو et al. 2012). Interestingly, the captive douc diet  
642 contained more protein than the wild douc diet, which may explain why *Bacteroides* was a  
643 dominant member of the captive douc microbiome, yet virtually absent from the wild douc  
644 microbiome.  
645

646 Another notable example of this diet-microbiome relationship seen in our analysis was with the  
647 genus *Oscillospira*, which has a known association with the consumption of plant material,  
648 including leaves and grass cuticles (Clarke 1979, Mackie et al. 2003, Yanagita et al. 2003,  
649 Zoetendal et al. 2013). *Oscillospira* was markedly increased in the wild doucs compared to the  
650 other douc populations, and was more abundant in the semi-wild and semi-captive doucs than in  
651 the captive population. The observed differences in abundance of *Oscillospira* between douc  
652 populations was likely a function of the stark differences in dietary consumption between  
653 populations, and most importantly, the difference in diversity and proportion of plants and plant  
654 parts consumed by the different douc populations examined. Wild, semi-wild, and, to a lesser  
655 degree, semi-captive doucs all consume diets that contain a higher proportion and diversity of  
656 plants compared to the captive population. Aside from *Oscillospira*, overall douc microbiome  
657 composition seemed to be, at the very least, partially driven by plant abundance and diversity in  
658 the diet. While a high variety of plant species is bound to impact the gut microflora, the sheer  
659 differences in proportion of the diet which is plants is likely to be equally as much of a causative  
660 factor (de Menezes et al. 2011). In this study, we utilized both known dietary makeup and  
661 measured chloroplast content (via 16S rRNA sequencing) to detail plant consumption by each  
662 douc population. We observed a striking downward trend in the number of plant genera and  
663 species consumed by increasing captivity of lifestyle (Figure 6a; Figure 6b). The measured  
664 chloroplast content of the stool mirrored this downward trend (Figure 7a). Further, we were able  
665 to observe trends in plant taxon composition, although the resolution of the chloroplast analysis  
666 was limited approximately to the plant class level. Some of the patterns of overlap observed  
667 mirrored the overlap in plant genera fed to the doucs, but we were unable to confirm whether the  
668 presence of the plant classes/orders reported in the chloroplast analysis indeed coincided with the  
669 specific plants fed to the doucs in the different lifestyles. Further targeted plant genomic screens  
670 may expand upon this proof of concept in the future.  
671

672 An unexpected result found in this study was the high abundance of the genus *Akkermansia*  
673 found in the semi-wild doucs. While *Akkermansia* was most abundant in the semi-wild doucs by  
674 far, this genus was also more abundant in the wild doucs than doucs living semi-captive and  
675 captive lifestyles. Members of the genus *Akkermansia*, such as *Akkermansia muciniphila*, are  
676 known for their roles in mucin-degradation, and have been suggested to play protective roles in  
677 the gut (Belzer and de Vos 2012, Everard et al. 2013). Everard et al. (2013) showed that obese  
678 and type 2 diabetic mice had decreased abundance of *A. muciniphila*, and treatment with this  
679 microbe reversed high-fat diet-induced metabolic disorders. Interestingly, a recent study  
680 examining the link between gut microbiota and primate GI health found GI-unhealthy doucs had

681 reduced relative abundances of *Akkermansia* (Amato et al. 2016). Another study examining gut  
682 microbiome composition of a colobine primate, *Rhinopithecus brelichi*, showed that  
683 *Akkermansia* was more abundant in captive individuals when compared to their wild  
684 counterparts, which is different than what was seen in doucs (Hale 2014). The extremely high  
685 abundance of *Akkermansia* in the semi-wild doucs combined with the higher level seen in wild  
686 doucs compared to semi-captive and captive doucs suggests that the microbe is linked to diet, as  
687 the diets of wild and semi-wild doucs contain much more plant diversity compared to those of  
688 the captive doucs.

689  
690 We examined the F:B ratio, as this ratio is important in humans in terms of dietary energy  
691 extraction (Ley et al. 2008, Turnbaugh et al. 2006). We saw a higher F:B ratio in wild and semi-  
692 wild doucs compared to semi-captive and captive doucs. Ley et al. (2006) found an increased  
693 presence of Firmicutes with a corresponding decrease of Bacteroidetes correlating with an  
694 overall greater energy harvest (Ley et al. 2006). Based on our results, it appears a decrease in the  
695 F:B ratio was clearly associated with lifestyle, notably diet, as the wild doucs had the highest  
696 ratio, followed by the semi-wild doucs, semi-captive doucs, and captive doucs. As previously  
697 mentioned, wild and semi-wild diets contained substantially more plant matter than captive diets.  
698 Naturally this equates to diets much higher in fiber fractions (ADF, NDF). Due to the scarcity of  
699 high-quality food items in the wild, we witnessed doucs ingesting very fibrous plant parts such as  
700 bark, mature leaves, flowers, seeds and unripe fruit. In the semi-wild facility, the doucs are  
701 habituated and know that they will receive leaf meals which provides them with a balance of  
702 fiber and soluble nutrients, making the ingestion of very fibrous items such as bark unnecessary.  
703 This can partially explain the higher reported NDF values in wild doucs when compared to semi-  
704 wild doucs. This relationship between F:B ratio and diet was expected, as our results show  
705 captive populations have diets lower in fiber fractions and higher in soluble carbohydrates,  
706 notably sugars, when compared to wild or semi-wild populations. Overall, the differences in the  
707 F:B ratio observed between populations living in natural versus unnatural settings, suggests the  
708 ratio is an indicator of overall gut health, as a higher ratio is associated with a higher  
709 fermentation efficiency and increased VFA production (Amato et al. 2014, Turnbaugh et al.  
710 2006), and doucs living under artificial (i.e., captive) conditions, which had a lower ratio, often  
711 suffer from a wasting syndrome (Crissey and Pribyl 1997, Lacasse et al. 2007).

### 712 713 **Putative functional associations with lifestyle**

714 PICRUST-predicted functional pathways show a few interesting trends. Interestingly, captivity  
715 appears to be correlated with pathways spanning metabolism of antibiotics, nutrients, and  
716 xenobiotics, as well as other potentially relevant trends. In terms of antibiotics, beta-lactam  
717 antibiotic resistance genes were enriched in captivity alongside its production (penicillin and  
718 cephalosporin biosynthesis) in captive lifestyles. Tetracycline resistance genes, in contrast, were  
719 elevated in the wild without an attendant significant upregulation of resistance. This pattern  
720 raises the possibility that the antibiotics pathways upregulated in captivity may be adapted for  
721 competition and virulence factor regulation (Balasubramanian et al. 2011), whereas the pathways  
722 upregulated in the wild may play more of a quorum sensing role (Lu 2006).

723  
724 Another interesting trend is the apparent tradeoff between amino acid metabolism in the wild and  
725 lipid metabolism in captivity, two important umbrella pathways (hierarchically from top level of  
726 KEGG, Metabolism -> Lipid Metabolism and Metabolism -> Amino Acid Metabolism). This

727 pronounced trend is likely indicative of the highly different diets received by the populations and  
728 may reflect differences in plant species consumed, the differences in microbiome composition in  
729 response to different nutrient profiles, or other lifestyle factors including antibiotics exposure.  
730 Additionally, the differentially increased motility of the members of the wild microbiome  
731 (evidenced by upregulated cytoskeletal regulation, flagellar and motility proteins, and  
732 chemotaxis) may imply increased vigor and facilitate nutrient scavenging. The increasing  
733 differential abundance of sporulation and germination pathways with wildness may also  
734 highlight the resilience of the wild microbiota, and may be due in part to various members of  
735 order Clostridiales (many of which can form spores and later germinate from them) also being  
736 differentially more abundant.

737  
738 There are some particularly intriguing trends concerning xenobiotic (pollutant) degradation.  
739 Xylene, dioxins, atrazine, and chloroalkane/ene degradation levels are significantly associated  
740 with increasing wildness of lifestyle. Setting aside the expected presence of toxic chemicals in  
741 the douc's natural diet, all of these compounds have been associated with wartime chemicals.  
742 Specifically, agent orange and other war chemicals deployed during the Vietnam Conflict are  
743 atrazines and dioxins. Dioxins are also byproducts of forest fires and several types of  
744 manufacturing processes. They are persistent in the environment (Schechter et al. 2006), and  
745 studies have shown that manufacturing workers who are in direct contact with dioxins have an  
746 increased risk for the development of cancer (Kogevinas et al. 1995). Son Tra Nature Reserve,  
747 the research site where wild douc fecal samples were collected, is located approximately 8 km  
748 from Danang International Airport. This airport is considered one of the world's most dioxin-  
749 contaminated sites. There are over 187,000 square meters of contaminated soil located in several  
750 sites near the airport (Minh et al. 2009). Similarly, jet fuel and industrial solvents often contain  
751 xylene, another xenobiotic upregulated in wilder lifestyles. The semi-wild population, which  
752 shows a peak in xylene degradation, is located in Singapore, which contains the largest xylene  
753 plant (Tremblay 2011). When refined into xylyl, xylene was also used as a wartime riot control  
754 agent (Olajos and Stopford 2004). Interestingly, the reverse (i.e. showing an increase with  
755 captivity) is observed for the degradation pathways of other pollutants often associated with  
756 industrialized economies such as ethylbenzenes (Welch and Fallon 2005), styrenes (often  
757 industrially synthesized from ethylbenzenes) (James and Castor 1994), and toluene (Fishbein  
758 1987), which may indicate forms of air contamination or other "first-world" pollutants. Given  
759 this, coupled with the fact that wild doucs consume plants rich in toxic compounds, we  
760 hypothesize that the microbiome of wild red-shanked doucs serves a detoxification role for the  
761 animal and therefore is enriched for taxa with the ability to degrade local contaminants. Another  
762 interesting implication is that the microbiome may function as a geochemical sensor of  
763 environment, where passage through a host may modulate detection sensitivity for certain  
764 compounds through dietary biomagnification.

765

### 766 **Viewing the microbiome as compositional data**

767 From a statistical standpoint, the treatment of microbiome data in a modern compositional  
768 framework (Gloor et al. 2016) frees microbial composition data from the simplex and allows  
769 many standard univariate statistical analysis techniques to apply (Van den Boogaart and  
770 Tolosana-Delgado 2013). With the observation that most bacterial abundances post-CLR  
771 transformation appeared to be roughly gaussian, the polyserial correlation test became applicable  
772 to assess the degree by which each microbial or functional pathway abundance was correlated

773 with the latent continuous variable captured by the four ordered “lifestyle” categories. For  
774 additional conservatism, the nonparametric Wilcoxon rank-sum test was also used on the two  
775 extrema of the assumed gradient (the “Wild” and “Captive” lifestyles), and the significance  
776 criterion for an association was amended to require both strong polyserial correlation (absolute  
777  $\rho$  above 0.3) as well as corrected Wilcoxon p-values less than 0.05. Importantly, this  
778 compositional framework allows for the highly-powered and gradient-centric interpretation and  
779 visualization of microbial and functional data.

780  
781 By modeling the lifestyle groups themselves as a latent gradient variable, we are assessing  
782 microbial and functional relationships with a composite metric of “wildness” or “lifestyle  
783 perturbation,” and hence avoid the use of other potentially confounded covariates such as  
784 climatic factors, diversity of plant species consumed, frequency of human contact, or health  
785 markers as individual proxies. In so doing, these and other covariates can be interpreted in  
786 relation to one another. Our focus in this work was to ascertain which microbes and microbially-  
787 deduced functional pathways were correlated with lifestyle and interpret these correlations in  
788 context of collected health and dietary data.

789  
790 This analysis revealed a selection of strongly correlated, statistically significant microbial  
791 biomarkers indicative of the health and well-being of the red-shanked douc across lifestyle  
792 conditions. These trends may have implications to human and livestock health, as the douc may  
793 serve as a genetically similar model for the former, and a digestively similar model for the latter.  
794 Since the microbiome itself is associated with host genetics as well as digestive functions and  
795 diseases (Knights et al. 2014), this study provides the framework for and invites further  
796 investigation of this potential model organism for the applicability of these findings within other  
797 species.

798  
799 **ACKNOWLEDGEMENTS:**  
800 We thank the Endangered Primate Rescue Center, Singapore Zoo, and Philadelphia Zoo for  
801 providing fecal samples from semi-wild, semi-captive, and captive red-shanked doucs; Tran Van  
802 Luong, Nguyen Van Bay, and Nguyen Manh Tien for their permission to work in Son Tra Nature  
803 Reserve and for their continued support and help; Kieu Thi Kinh and Thai Van Quang for help in  
804 obtaining the research permits; the Department of Forest Protection, the Danang University, and  
805 the Son Tra Nature Reserve for granting the research permits; and Christina Valeri and James  
806 Collins at the University of Minnesota Veterinary Diagnostic Laboratory for their assistance with  
807 acquiring and maintaining shipping permits. This research was funded in part by the Margot  
808 Marsh Biodiversity Foundation; the Mohamed bin Zayed Species Conservation Fund; and the  
809 National Institutes of Health through a PharmacoNeuroImmunology Fellowship (NIH/National  
810 Institute on Drug Abuse T32 DA007097-32) awarded to JBC.

811

812 **TABLES:**

813 **Table 1: Dietary components of red-shanked doucs living four distinct lifestyles, including**  
814 **wild, semi-wild, semi-captive, and captive.**

| Dietary Groups        | Proportion of Diet (%) |           |              |         |
|-----------------------|------------------------|-----------|--------------|---------|
|                       | Wild                   | Semi-wild | Semi-captive | Captive |
| Leaves*               | 65.50                  | 100.00    | 66.10        | 1.40    |
| Flowers               | 5.30                   | 0.00      | 0.00         | 0.00    |
| Seeds                 | 2.00                   | 0.00      | 0.00         | 0.00    |
| Unripe Fruit          | 17.80                  | 0.00      | 0.00         | 0.00    |
| Other plant parts**   | 9.40                   | 0.00      | 0.00         | 0.00    |
| Pellets               | 0.00                   | 0.00      | 0.90         | 7.30    |
| Fruits and Vegetables | 0.00                   | 0.00      | 33.00        | 90.90   |
| Cereals               | 0.00                   | 0.00      | 0.00         | 0.40    |

815 \* Values for leaves may also include petioles or stems.

816 \*\*Other plant parts include pith, bark and leaf buds.

817  
818  
819  
820  
821  
822  
823  
824  
825  
826  
827  
828  
829  
830  
831  
832  
833  
834  
835  
836  
837  
838



839 **Table 2: Plant genera observed in douc populations by lifestyle.**

| Diets by Lifestyle | Captive        | Semi-captive                                                                                                                                                                                                                                                                                                          | Semi-wild <sup>1</sup>                                                                                                                                                                                                                                                                                                                                                                                                                                                                                                                                                                                                                                                                                                                     | Wild                                                                                                                                                                                                                                                                                                                                                                                                                                                                                                                                                                                                                                                                                                                                                                                         |
|--------------------|----------------|-----------------------------------------------------------------------------------------------------------------------------------------------------------------------------------------------------------------------------------------------------------------------------------------------------------------------|--------------------------------------------------------------------------------------------------------------------------------------------------------------------------------------------------------------------------------------------------------------------------------------------------------------------------------------------------------------------------------------------------------------------------------------------------------------------------------------------------------------------------------------------------------------------------------------------------------------------------------------------------------------------------------------------------------------------------------------------|----------------------------------------------------------------------------------------------------------------------------------------------------------------------------------------------------------------------------------------------------------------------------------------------------------------------------------------------------------------------------------------------------------------------------------------------------------------------------------------------------------------------------------------------------------------------------------------------------------------------------------------------------------------------------------------------------------------------------------------------------------------------------------------------|
| Plant genus/genera | * <i>Morus</i> | <i>Acalypha</i><br>** <i>Adenanthera</i><br><i>Asystasia</i><br>** <i>Cinnamomum</i><br>** <i>Hibiscus</i><br><i>Khaya</i><br>** <i>Leucaena</i><br>**** <i>Litsea</i><br><i>Moringa</i><br>* <i>Morus</i><br><i>Polygonum</i><br><i>Pterocarpus</i><br>*** <i>Syzygium</i><br><i>Tamarindus</i><br><i>Terminalia</i> | ** <i>Adenanthera</i><br><i>Alangium</i><br><i>Albizzia</i><br><i>Alchornea</i><br><i>Averrhoa</i><br><i>Bidens</i><br><i>Cassia</i><br>**** <i>Celtis</i><br>** <i>Cinnamomum</i><br>**** <i>Claoxylon</i><br><i>Clerodendrum</i><br><i>Crateva</i><br>**** <i>Dalbergia</i><br><i>Delonix</i><br><i>Derris</i><br><i>Dimocarpus</i><br><i>Elaeocarpus</i><br><i>Euodia</i><br>**** <i>Ficus</i><br>** <i>Hibiscus</i><br>**** <i>Ilex</i><br>** <i>Leucoena</i><br>**** <i>Litsea</i><br><i>Maesa</i><br><i>Micromelum</i><br><i>Mussaenda</i><br>**** <i>Oroxylon</i><br><i>Phyllanthus</i><br><i>Rhus</i><br><i>Saurauia</i><br><i>Sterculia</i><br><i>Triadica</i><br>**** <i>Vitex</i><br><i>Wrightia</i><br>**** <i>Zanthoxylum</i> | <i>Acacia</i><br><i>Amesiodendron</i><br><i>Ancistrocladus</i><br><i>Antidesma</i><br><i>Aporusa</i><br><i>Barringtonia</i><br><i>Beilschmiedia</i><br><i>Bischofia</i><br><i>Brownlowia</i><br><i>Callerya</i><br>**** <i>Celtis</i><br>**** <i>Claoxylon</i><br><i>Cleidion</i><br>**** <i>Dalbergia</i><br><i>Diospyros</i><br><i>Dipterocarpus</i><br>**** <i>Ficus</i><br><i>Glochidion</i><br><i>Gluta</i><br><i>Gmelina</i><br>**** <i>Ilex</i><br><i>Litchi</i><br><i>Lithocarpus</i><br>**** <i>Litsea</i><br><i>Mallotus</i><br><i>Millettia</i><br><i>Mischocarpus</i><br><i>Nauclea</i><br><i>Ochrocarpus</i><br><i>Ormosia</i><br>**** <i>Oroxylon</i><br><i>Parashorea</i><br><i>Quercus</i><br><i>Rothmannia</i><br><i>Sandoricum</i><br><i>Schefflera</i><br><i>Scolopia</i> |

|  |  |  |  |                                                                                   |
|--|--|--|--|-----------------------------------------------------------------------------------|
|  |  |  |  | <i>***Syzygium</i><br><i>Uvaria</i><br><i>****Vitex</i><br><i>****Zanthoxylum</i> |
|--|--|--|--|-----------------------------------------------------------------------------------|

840 <sup>1</sup>Combination of data collected by JBC for this study and data lifted from Otto (2005)

841 \*Shared between captive and semi-captive

842 \*\*Shared between semi-captive and semi-wild

843 \*\*\*Shared between semi-captive and wild

844 \*\*\*\*Shared between semi-wild and wild

845 \*\*\*\*\*Shared between semi-captive, semi-wild, and wild

846

847 **Table 3: Nutrient content on a dry matter basis from red-shanked doucs living four distinct**  
848 **lifestyles, wild, semi-wild, semi-captive, and captive.**

| Diet               | Wild <sup>1</sup>  | Semi-wild <sup>1</sup> | Semi-captive <sup>1</sup> | Captive <sup>1</sup> |
|--------------------|--------------------|------------------------|---------------------------|----------------------|
| Crude Protein (%)  | 9.46               | 16.52                  | 13.37                     | 16.70                |
| Crude Fat (%)      | -                  | 3.23                   | 3.12                      | 3.71                 |
| Soluble Sugars (%) | 2.70               | 2.28                   | -                         | 7.90                 |
| ADF (%)            | 46.76 <sup>2</sup> | 23.20 <sup>3</sup>     | 23.07                     | 8.65                 |
| NDF (%)            | 53.67 <sup>2</sup> | 35.60 <sup>3</sup>     | 31.97                     | 12.64                |
| Calcium (%)        | 0.49               | 1.05                   | 0.22                      | 0.72                 |
| Potassium (%)      | 0.96               | 0.76                   | 0.21                      | 0.29                 |
| Sodium (%)         | 0.01               | 0.01                   | 0.24                      | 0.27                 |
| Zinc (mg/kg)       | 19.39              | 101.59                 | 8.25                      | 26.30                |
| Iron (mg/kg)       | 26.50              | 337.32                 | 20.74                     | 64.33                |

849 Semi-captive diet also included a vitamin and mineral supplement which was not included in the  
850 analysis.

851 <sup>1</sup>Values from Clayton et al. (2016).

852 NDF (Neutral Detergent Fiber) and ADF (Acid Detergent Fiber) were not available from the  
853 laboratory analyses, therefore values for <sup>2</sup> were taken from Ulibarri (2013) and <sup>3</sup> were lifted  
854 from Otto (2005) in order for a comparison to be possible.

855

856 **SUPPLEMENTAL TABLES:**

857 **Supplemental Table 1: Differentially abundant genera.** Statistical significance of  
 858 differentiation was assessed using pairwise Wilcoxon rank-sum tests of each taxon's centered-  
 859 log-ratio transformed abundance in the Captive and Wild lifestyles, as well as the polyserial  
 860 correlation of the same across all four lifestyles as the ordered factor Wild < Semi-wild < Semi-  
 861 captive < Captive. The polyserial correlation column is colored according to intensity of  
 862 correlation; blue signifies decreased abundance with captivity level and yellow increased  
 863 abundance with captivity level. For the adjusted p-values (Q value column), intensity of color  
 864 corresponds to Wilcoxon p-value up to alpha = 0.05. Criteria for display included having an  
 865 adjusted Wilcoxon rank-sum  $p < 0.05$ , absolute polyserial correlation above 0.3, and polyserial  
 866 rho  $p$ -value < 0.05. Taxa are displayed at the most specific taxonomic level to which they were  
 867 annotated; taxa lacking annotation at the genus level can be interpreted as being "other" genera  
 868 within the level of taxonomy they occupy.

| Taxa (up to Genus)                                                                                           | Polyserial Correlation | Captive vs Wild Q |
|--------------------------------------------------------------------------------------------------------------|------------------------|-------------------|
| k_Bacteria;p_Firmicutes;c_Clostridia;o_Clostridiales;f_Lachnospiraceae;g_Shuttleworthia                      | -0.9699471             | 2.05E-09          |
| k_Bacteria;p_Proteobacteria;c_Alphaproteobacteria;o_Rickettsiales;f_Rickettsiaceae;g_Wolbachia               | -0.8892253             | 0.000187015       |
| k_Bacteria;p_Actinobacteria;c_Coriobacteriia;o_Coriobacteriales;f_Coriobacteriaceae;g_Adlercreutzia          | -0.8398788             | 1.02E-11          |
| k_Bacteria;p_Bacteroidetes;c_Bacteroidia;o_Bacteroidales;f_Bacteroidaceae                                    | -0.8380668             | 1.01E-07          |
| k_Bacteria;p_Proteobacteria;c_Epsilonproteobacteria;o_Campylobacterales;f_Campylobacteraceae;g_Campylobacter | -0.8270076             | 2.99E-10          |
| k_Bacteria;p_Proteobacteria;c_Alphaproteobacteria;o_Rhodospirillales;f_Rhodospirillaceae                     | -0.825024              | 0.000439766       |
| k_Bacteria;p_Firmicutes;c_Bacilli;o_Bacillales;f_Planococcaceae                                              | -0.8088798             | 0.000395901       |
| k_Bacteria;p_Firmicutes;c_Clostridia;o_Clostridiales;f_Lachnospiraceae;g_Clostridium                         | -0.8021905             | 0.0002493         |
| k_Bacteria;p_Proteobacteria;c_Alphaproteobacteria;o_Rhizobiales;f_Hyphomicrobiaceae;g_Rhodoplanes            | -0.7650339             | 0.00050822        |
| k_Bacteria;p_Proteobacteria;c_Alphaproteobacteria;o_Rickettsiales;f_mitochondria                             | -0.761066              | 1.02E-11          |
| k_Bacteria;p_Tenericutes;c_Mollicutes;o_Anaeroplasmatales;f_Anaeroplasmataceae                               | -0.7606545             | 2.00E-11          |
| k_Bacteria;p_Firmicutes;c_Clostridia;o_Clostridiales;f_Lachnospiraceae;g_Dorea                               | -0.7495691             | 2.54E-08          |
| k_Bacteria;p_Proteobacteria;c_Alphaproteobacteria;o_Rhizobiales;f_Methylocystaceae                           | -0.7440362             | 0.000938513       |
| k_Bacteria;p_Firmicutes;c_Clostridia;o_Clostridiales;f_Dehalobacteriaceae;g_Dehalobacterium                  | -0.7394288             | 2.26E-11          |
| k_Bacteria;p_Firmicutes;c_Clostridia;o_Clostridiales;f_Ruminococcaceae;g_Oscillospira                        | -0.7392849             | 5.80E-11          |
| k_Bacteria;p_Firmicutes;c_Clostridia;o_Clostridiales;f_Lachnospiraceae;g_Blautia                             | -0.7340071             | 1.04E-09          |
| k_Bacteria;p_Verrucomicrobia;c_Opitutae;o_HA64                                                               | -0.6889126             | 0.003672916       |
| k_Bacteria;p_Proteobacteria;c_Alphaproteobacteria;o_Rickettsiales                                            | -0.6837371             | 0.000210592       |
| k_Bacteria;p_Firmicutes;c_Clostridia;o_Clostridiales;f_Veillonellaceae;g_Selenomonas                         | -0.6785613             | 0.0002493         |
| k_Bacteria;p_Actinobacteria;c_Actinobacteria;o_Actinomycetales;f_Frankiaceae                                 | -0.6764886             | 0.00088488        |
| k_Bacteria;p_Firmicutes;c_Clostridia;o_Clostridiales;f_Veillonellaceae                                       | -0.6748278             | 7.49E-06          |
| k_Bacteria;p_Firmicutes;c_Clostridia;o_Clostridiales;f_Lachnospiraceae;g_Anaerostipes                        | -0.651836              | 6.33E-07          |
| k_Bacteria;p_Proteobacteria;c_Alphaproteobacteria;o_Rhodospirillales;f_Acetobacteraceae                      | -0.6301408             | 0.00069679        |
| k_Bacteria;p_Proteobacteria;c_Betaproteobacteria;o_Burkholderiales;f_Comamonadaceae;g_Comamonas              | -0.6292526             | 0.02536496        |
| k_Bacteria;p_Tenericutes;c_Mollicutes;o_RF39                                                                 | -0.625586              | 0.001970251       |
| k_Bacteria;p_Actinobacteria;c_Coriobacteriia;o_Coriobacteriales;f_Coriobacteriaceae                          | -0.6063056             | 8.99E-09          |
| k_Bacteria;p_Proteobacteria;c_Betaproteobacteria;o_Burkholderiales                                           | -0.5887106             | 0.0118638         |
| k_Bacteria;p_Firmicutes;c_Clostridia;o_Clostridiales;f_Syntrophomonadaceae;g_Syntrophomonas                  | -0.5872707             | 0.006156004       |
| k_Bacteria;p_Firmicutes;c_Bacilli;o_Bacillales;f_Paenibacillaceae;g_Paenibacillus                            | -0.5866233             | 0.000439766       |
| k_Bacteria                                                                                                   | -0.5848206             | 0.001918287       |
| k_Bacteria;p_Firmicutes;c_Clostridia;o_Clostridiales;f_Lachnospiraceae;g_Moryella                            | -0.577989              | 0.000216108       |
| k_Bacteria;p_Proteobacteria;c_Gammaproteobacteria;o_Xanthomonadales;f_Xanthomonadaceae                       | -0.5762689             | 0.009130425       |
| k_Bacteria;p_Verrucomicrobia;c_Verrucomicrobiae;o_Verrucomicrobiales;f_Verrucomicrobiaceae;g_Akkermansia     | -0.5715996             | 1.29E-09          |

|                                                                                                         |            |             |
|---------------------------------------------------------------------------------------------------------|------------|-------------|
| k_Bacteria;p_Cyanobacteria;c_4C0d-2;o_YS2                                                               | -0.5607493 | 0.000241094 |
| k_Bacteria;p_Tenericutes;c_RF3;o_ML615J-28                                                              | -0.5542703 | 0.02536496  |
| k_Bacteria;p_Actinobacteria;c_Coriobacteriia;o_Coriobacteriales;f_Coriobacteriaceae;g_Atopobium         | -0.5499778 | 9.63E-08    |
| k_Bacteria;p_Firmicutes;c_Clostridia;o_Clostridiales;f_EtOH8                                            | -0.5457671 | 0.001797864 |
| k_Bacteria;p_Firmicutes;c_Clostridia;o_Clostridiales;f_Lachnospiraceae;g_Lachnobacterium                | -0.5430707 | 0.000156027 |
| k_Bacteria;p_Proteobacteria;c_Alphaproteobacteria;o_Rhizobiales;f_Bradyrhizobiaceae;g_Bradyrhizobium    | -0.5269235 | 0.01718809  |
| k_Bacteria;p_Firmicutes;c_Clostridia;o_Clostridiales;f_Lachnospiraceae;g_Butyrvivrio                    | -0.517606  | 1.88E-07    |
| k_Bacteria;p_Firmicutes;c_Clostridia;o_Clostridiales;f_Lachnospiraceae;g_Coprococcus                    | -0.5076206 | 0.03173796  |
| k_Bacteria;p_Actinobacteria;c_Actinobacteria;o_Bifidobacteriales;f_Bifidobacteriaceae;g_Bifidobacterium | -0.506083  | 0.04068748  |
| k_Bacteria;p_Bacteroidetes;c_Bacteroidia;o_Bacteroidales;f_Porphryomonadaceae;g_Dysgonomonas            | -0.5010785 | 0.012117    |
| k_Bacteria;p_Actinobacteria;c_Actinobacteria;o_Actinomycetales;f_Microbacteriaceae;g_Curtobacterium     | -0.4990236 | 0.001183907 |
| k_Bacteria;p_Actinobacteria;c_Thermoleophilia;o_Solirubrobacterales                                     | -0.4826565 | 0.001162568 |
| k_Bacteria;p_Proteobacteria;c_Alphaproteobacteria;o_Rhizobiales;f_Rhizobiaceae;g_Agrobacterium          | -0.4681888 | 0.00017455  |
| k_Bacteria;p_Firmicutes;c_Clostridia;o_Clostridiales;f_Ruminococcaceae                                  | -0.4419976 | 2.17E-08    |
| k_Bacteria;p_Firmicutes;c_Bacilli;o_Bacillales;f_Staphylococcaceae;g_Staphylococcus                     | -0.4289325 | 0.01752383  |
| k_Bacteria;p_Proteobacteria;c_Gammaproteobacteria;o_Pseudomonadales;f_Pseudomonadaceae                  | -0.3895052 | 0.02364246  |
| k_Bacteria;p_TM7;c_TM7-3;o_CW040;f_F16                                                                  | -0.3855686 | 0.000216108 |
| k_Bacteria;p_Proteobacteria;c_Alphaproteobacteria;o_Sphingomonadales;f_Sphingomonadaceae                | -0.3203931 | 0.000911378 |
| k_Bacteria;p_Firmicutes;c_Bacilli;o_Bacillales                                                          | -0.3172278 | 0.001162568 |
| k_Bacteria;p_Proteobacteria;c_Alphaproteobacteria;o_Rhizobiales;f_Hyphomicrobiaceae;g_Devesia           | -0.3157396 | 0.001004876 |
| k_Bacteria;p_Firmicutes;c_Erysipelotrichi;o_Erysipelotrichales;f_Erysipelotrichaceae;g_Bulleidia        | 0.3813922  | 0.02450248  |
| k_Bacteria;p_Bacteroidetes;c_Bacteroidia;o_Bacteroidales;f_S24-7                                        | 0.4273285  | 1.13E-05    |
| k_Bacteria;p_Proteobacteria;c_Deltaproteobacteria;o_Desulfovibrionales;f_Desulfovibrionaceae            | 0.4355352  | 8.98E-06    |
| k_Bacteria;p_Firmicutes;c_Clostridia;o_Clostridiales;f_Peptostreptococcaceae                            | 0.48779    | 0.01279911  |
| k_Bacteria;p_Verrucomicrobia;c_Verruco-5;o_WCHB1-41;f_RFP12                                             | 0.4960677  | 0.000255566 |
| k_Bacteria;p_Firmicutes;c_Clostridia;o_Clostridiales;f_Ruminococcaceae;g_Faecalibacterium               | 0.5162926  | 3.22E-09    |
| k_Bacteria;p_Bacteroidetes;c_Bacteroidia;o_Bacteroidales;f_[Odoribacteraceae];g_Butyricimonas           | 0.5359491  | 0.03027383  |
| k_Bacteria;p_Firmicutes;c_Bacilli;o_Lactobacillales;f_Lactobacillaceae;g_Lactobacillus                  | 0.5724962  | 0.000770276 |
| k_Bacteria;p_Bacteroidetes;c_Bacteroidia;o_Bacteroidales;f_p-2534-18B5;g_BE24                           | 0.5802903  | 0.000425919 |
| k_Bacteria;p_Proteobacteria;c_Alphaproteobacteria;o_RF32                                                | 0.6515223  | 1.88E-07    |
| k_Bacteria;p_Proteobacteria;c_Deltaproteobacteria;o_GMD14H09                                            | 0.6669349  | 0.000568521 |
| k_Bacteria;p_Proteobacteria;c_Betaproteobacteria;o_Rhodocyclales;f_Rhodocyclaceae                       | 0.6705603  | 0.00262937  |
| k_Bacteria;p_Bacteroidetes;c_Bacteroidia;o_Bacteroidales;f_Rikenellaceae                                | 0.7092134  | 1.86E-10    |
| k_Bacteria;p_Bacteroidetes;c_Bacteroidia;o_Bacteroidales;f_[Paraprevotellaceae];g_YRC22                 | 0.7118106  | 1.70E-06    |
| k_Bacteria;p_Spirochaetes;c_Spirochaetes;o_Spirochaetales;f_Spirochaetaceae;g_Treponema                 | 0.7119026  | 1.83E-09    |
| k_Bacteria;p_Lentisphaerae;c_[Lentisphaeria];o_Victivallales;f_Victivallaceae                           | 0.7404875  | 0.006156004 |
| k_Bacteria;p_Bacteroidetes;c_Bacteroidia;o_Bacteroidales;f_Prevotellaceae;g_Prevotella                  | 0.7438575  | 1.40E-08    |
| k_Bacteria;p_Bacteroidetes;c_Bacteroidia;o_Bacteroidales;f_RF16                                         | 0.7515577  | 0.01445429  |
| k_Bacteria;p_Bacteroidetes;c_Bacteroidia;o_Bacteroidales;f_[Paraprevotellaceae];g_CF231                 | 0.7751741  | 6.04E-08    |
| k_Bacteria;p_Bacteroidetes;c_Bacteroidia;o_Bacteroidales                                                | 0.7845308  | 6.06E-07    |
| k_Archaea;p_Euryarchaeota;c_Methanobacteria;o_Methanobacteriales;f_Methanobacteriaceae;g_Methanosphaera | 0.7990684  | 2.36E-10    |
| k_Bacteria;p_Bacteroidetes;c_Bacteroidia;o_Bacteroidales;f_Bacteroidaceae;g_Bacteroides                 | 0.8021878  | 1.14E-11    |

869  
870  
871  
872  
873



874 **Supplemental Table 2. Differentially abundant functional pathways.** Statistical significance  
 875 of differentiation was assessed using pairwise Wilcoxon rank-sum tests of each pathway's  
 876 centered-log-ratio transformed abundance in just the Captive and Wild lifestyles, as well as the  
 877 polyserial correlation of the same across all four lifestyles as the ordered factor Wild < Semi-  
 878 wild < Semi-captive < Captive. The polyserial correlation column is colored according to  
 879 intensity of correlation; blue signifies decreased abundance with captivity level and yellow  
 880 increased abundance with captivity level. For the adjusted p-values (Q value column), intensity  
 881 of color corresponds to Wilcoxon p-value up to  $\alpha = 0.05$ . Criteria for display included having  
 882 an adjusted Wilcoxon rank-sum  $p < 0.05$ , absolute polyserial correlation above 0.3, and  
 883 polyserial rho p-value  $< 0.05$ .

| Pathway                                             | Polyserial Correlation | Captive vs Wild Q |
|-----------------------------------------------------|------------------------|-------------------|
| Ubiquinone and other terpenoid-quinone biosynthesis | 0.86613                | 1.65E-11          |
| Vibrio cholerae pathogenic cycle                    | 0.8522796              | 1.76E-10          |
| Amino acid metabolism                               | 0.8485574              | 2.21E-11          |
| Toluene degradation                                 | 0.8355032              | 2.63E-11          |
| Lipoic acid metabolism                              | 0.8349192              | 1.47E-11          |
| Proximal tubule bicarbonate reclamation             | 0.8285716              | 2.34E-11          |
| Peroxisome                                          | 0.8264319              | 2.34E-11          |
| D-Glutamine and D-glutamate metabolism              | 0.809642               | 1.32E-11          |
| Transcription related proteins                      | 0.8057511              | 1.95E-11          |
| Translation factors                                 | 0.8016383              | 1.40E-11          |
| Protein processing in endoplasmic reticulum         | 0.7868988              | 2.62E-10          |
| Inositol phosphate metabolism                       | 0.7778543              | 1.86E-10          |
| Vitamin B6 metabolism                               | 0.7715443              | 2.96E-11          |
| Base excision repair                                | 0.7714182              | 2.92E-10          |
| Biosynthesis of vancomycin group antibiotics        | 0.7689167              | 2.76E-10          |
| Inorganic ion transport and metabolism              | 0.7637347              | 1.60E-10          |
| Glycine, serine and threonine metabolism            | 0.7581197              | 7.85E-10          |
| Oxidative phosphorylation                           | 0.7568452              | 6.65E-10          |
| beta-Lactam resistance                              | 0.7432696              | 1.91E-09          |
| Phosphatidylinositol signaling system               | 0.739012               | 6.11E-10          |
| Isoflavonoid biosynthesis                           | 0.7284541              | 2.31E-10          |
| Alanine, aspartate and glutamate metabolism         | 0.7259672              | 3.26E-09          |
| Tyrosine metabolism                                 | 0.7253912              | 2.92E-10          |
| Purine metabolism                                   | 0.7253711              | 8.19E-09          |
| Metabolism of cofactors and vitamins                | 0.7236583              | 6.63E-09          |
| Function unknown                                    | 0.7168606              | 6.63E-09          |
| Ascorbate and aldarate metabolism                   | 0.7161581              | 5.06E-09          |
| Protein folding and associated processing           | 0.7070021              | 3.26E-09          |
| Glutamatergic synapse                               | 0.7026025              | 4.82E-11          |
| Ubiquitin system                                    | 0.7021036              | 9.09E-11          |
| One carbon pool by folate                           | 0.694698               | 3.15E-11          |
| General function prediction only                    | 0.6884648              | 2.14E-08          |

|                                                            |           |             |
|------------------------------------------------------------|-----------|-------------|
| Polyketide sugar unit biosynthesis                         | 0.685304  | 1.32E-08    |
| Nucleotide excision repair                                 | 0.6826238 | 1.92E-08    |
| Other ion-coupled transporters                             | 0.677045  | 8.62E-09    |
| Phosphonate and phosphinate metabolism                     | 0.6754849 | 1.86E-10    |
| Sphingolipid metabolism                                    | 0.6597281 | 6.30E-09    |
| Valine, leucine and isoleucine degradation                 | 0.6583393 | 1.07E-10    |
| Aminobenzoate degradation                                  | 0.6487151 | 1.68E-10    |
| Renal cell carcinoma                                       | 0.6353665 | 3.17E-08    |
| Styrene degradation                                        | 0.6319073 | 5.33E-09    |
| Retinol metabolism                                         | 0.6318299 | 1.02E-07    |
| Lysine degradation                                         | 0.6300815 | 1.68E-10    |
| Ethylbenzene degradation                                   | 0.627926  | 4.13E-07    |
| beta-Alanine metabolism                                    | 0.6127058 | 1.84E-08    |
| Huntington's disease                                       | 0.6073938 | 7.66E-10    |
| Primary immunodeficiency                                   | 0.5987362 | 2.05E-06    |
| Bacterial secretion system                                 | 0.5980548 | 1.57E-06    |
| Tryptophan metabolism                                      | 0.5884344 | 4.71E-10    |
| Carbohydrate digestion and absorption                      | 0.5876023 | 5.04E-05    |
| Glyoxylate and dicarboxylate metabolism                    | 0.58556   | 1.76E-07    |
| Geraniol degradation                                       | 0.5758705 | 3.44E-08    |
| Pentose and glucuronate interconversions                   | 0.574738  | 2.94E-06    |
| Proteasome                                                 | 0.5693384 | 1.14E-09    |
| Glutathione metabolism                                     | 0.5680232 | 2.93E-09    |
| Primary bile acid biosynthesis                             | 0.5644047 | 1.90E-05    |
| Bacterial toxins                                           | 0.5640835 | 3.57E-07    |
| DNA repair and recombination proteins                      | 0.5619595 | 6.34E-07    |
| Butanoate metabolism                                       | 0.5611606 | 1.43E-05    |
| Sulfur metabolism                                          | 0.5512656 | 9.22E-06    |
| Carbon fixation in photosynthetic organisms                | 0.5487902 | 7.47E-05    |
| Cell cycle - Caulobacter                                   | 0.5453256 | 6.84E-06    |
| Influenza A                                                | 0.5451721 | 3.07E-09    |
| Arginine and proline metabolism                            | 0.5397563 | 4.52E-07    |
| Renin-angiotensin system                                   | 0.5395988 | 8.61E-05    |
| Peptidases                                                 | 0.5366534 | 2.69E-06    |
| Secondary bile acid biosynthesis                           | 0.5348466 | 0.000119449 |
| Pathways in cancer                                         | 0.5310567 | 1.59E-07    |
| Porphyrin and chlorophyll metabolism                       | 0.5304321 | 2.36E-06    |
| Penicillin and cephalosporin biosynthesis                  | 0.5278086 | 1.32E-07    |
| Epithelial cell signaling in Helicobacter pylori infection | 0.5246982 | 2.58E-08    |
| Taurine and hypotaurine metabolism                         | 0.5205521 | 2.64E-06    |
| Fatty acid metabolism                                      | 0.5196525 | 7.33E-07    |
| Linoleic acid metabolism                                   | 0.514908  | 2.21E-05    |

|                                                            |            |             |
|------------------------------------------------------------|------------|-------------|
| Limonene and pinene degradation                            | 0.5124961  | 2.25E-07    |
| Pyruvate metabolism                                        | 0.5080889  | 8.66E-06    |
| Betalain biosynthesis                                      | 0.5051249  | 1.12E-07    |
| Caprolactam degradation                                    | 0.5033751  | 1.84E-08    |
| Bladder cancer                                             | 0.5029604  | 2.16E-07    |
| Arachidonic acid metabolism                                | 0.4984154  | 0.03065246  |
| Indole alkaloid biosynthesis                               | 0.4961972  | 8.62E-09    |
| Chlorocyclohexane and chlorobenzene degradation            | 0.4911376  | 1.48E-07    |
| Adipocytokine signaling pathway                            | 0.4900165  | 4.52E-07    |
| Meiosis - yeast                                            | 0.4840796  | 4.69E-07    |
| Peptidoglycan biosynthesis                                 | 0.4716894  | 8.99E-08    |
| Hypertrophic cardiomyopathy (HCM)                          | 0.4646138  | 4.78E-06    |
| Glycosphingolipid biosynthesis - lacto and neolacto series | 0.463966   | 6.35E-06    |
| Bisphenol degradation                                      | 0.4605462  | 0.000143559 |
| Apoptosis                                                  | 0.4585675  | 6.01E-08    |
| Amyotrophic lateral sclerosis (ALS)                        | 0.4543189  | 8.12E-06    |
| Metabolism of xenobiotics by cytochrome P450               | 0.4531665  | 1.56E-05    |
| Drug metabolism - cytochrome P450                          | 0.4502912  | 9.81E-06    |
| Circadian rhythm - plant                                   | 0.4451969  | 0.000116798 |
| Naphthalene degradation                                    | 0.4430097  | 0.002843726 |
| Amino acid related enzymes                                 | 0.4348306  | 0.000212966 |
| Protein export                                             | 0.4147701  | 0.000265293 |
| Propanoate metabolism                                      | 0.4059516  | 0.002464333 |
| Amino sugar and nucleotide sugar metabolism                | 0.3813197  | 0.004732689 |
| Selenocompound metabolism                                  | 0.3793765  | 0.007380699 |
| Tuberculosis                                               | 0.3765017  | 0.000983163 |
| Stilbenoid, diarylheptanoid and gingerol biosynthesis      | 0.3715535  | 0.00017531  |
| Biosynthesis of unsaturated fatty acids                    | 0.364953   | 0.006819423 |
| Fluorobenzoate degradation                                 | 0.3606798  | 0.003021935 |
| Synthesis and degradation of ketone bodies                 | 0.3599332  | 0.008969831 |
| Galactose metabolism                                       | 0.3505926  | 0.02778041  |
| Cyanoamino acid metabolism                                 | 0.350403   | 0.01341671  |
| Ether lipid metabolism                                     | 0.346602   | 0.004607714 |
| p53 signaling pathway                                      | 0.3424512  | 0.001598621 |
| Colorectal cancer                                          | 0.3389656  | 0.002464333 |
| Small cell lung cancer                                     | 0.3389656  | 0.002464333 |
| Toxoplasmosis                                              | 0.3389656  | 0.002464333 |
| Viral myocarditis                                          | 0.3389656  | 0.002464333 |
| Flavone and flavonol biosynthesis                          | 0.3362552  | 0.03059393  |
| D-Alanine metabolism                                       | 0.3099026  | 0.04758065  |
| Flagellar assembly                                         | -0.4501591 | 0.01617119  |
| Restriction enzyme                                         | -0.4623062 | 6.60E-05    |

|                                                |            |             |
|------------------------------------------------|------------|-------------|
| Bacterial chemotaxis                           | -0.472489  | 0.006819423 |
| Bacterial invasion of epithelial cells         | -0.5033562 | 2.75E-08    |
| Calcium signaling pathway                      | -0.5058255 | 1.74E-10    |
| Photosynthesis - antenna proteins              | -0.5096998 | 1.60E-10    |
| Dioxin degradation                             | -0.5236634 | 0.000565156 |
| Chloroalkane and chloroalkene degradation      | -0.5241747 | 0.000413393 |
| Bacterial motility proteins                    | -0.5446488 | 0.000532686 |
| Replication, recombination and repair proteins | -0.5446959 | 0.000426365 |
| Tetracycline biosynthesis                      | -0.5466325 | 0.000769446 |
| Xylene degradation                             | -0.6628035 | 2.05E-07    |
| Mineral absorption                             | -0.6630577 | 4.53E-09    |
| Sporulation                                    | -0.7151384 | 1.23E-09    |
| African trypanosomiasis                        | -0.7423802 | 1.42E-10    |
| Germination                                    | -0.7761985 | 6.15E-11    |
| Atrazine degradation                           | -0.8109147 | 2.62E-10    |
| Cytoskeleton proteins                          | -0.824936  | 1.86E-10    |
| Lipid metabolism                               | -0.8911117 | 1.40E-11    |

884  
885  
886  
887  
888

**Supplemental Table 3: Plant orders observed in douc populations by lifestyle.**

| Diets by Lifestyle | Captive | Semi-captive                                                                                                                         | Semi-wild                                                                                                                                                                                         | Wild                                                                                                                                                                                                           |
|--------------------|---------|--------------------------------------------------------------------------------------------------------------------------------------|---------------------------------------------------------------------------------------------------------------------------------------------------------------------------------------------------|----------------------------------------------------------------------------------------------------------------------------------------------------------------------------------------------------------------|
| Plant order/orders | Rosales | *Brassicales<br>Caryophyllales<br>*Fabales<br>Lamiales<br>Laurales<br>Malpighiales<br>Malvales<br>*Myrtales<br>Rosales<br>Sapindales | Aquifoliales<br>*Asterales<br>*Brassicales<br>*Cornales<br>*Ericales<br>*Fabales<br>*Gentianales<br>*Lamiales<br>*Laurales<br>*Malpighiales<br>*Malvales<br>Oxalidales<br>*Rosales<br>*Sapindales | Apiales<br>Aquifoliales<br>*Caryophyllales<br>*Ericales<br>*Fabales<br>*Fagales<br>*Gentianales<br>*Lamiales<br>*Laurales<br>Magnoliales<br>*Malpighiales<br>*Malvales<br>*Myrtales<br>*Rosales<br>*Sapindales |

889 \*Plant orders recovered via 16S rRNA sequencing (at least 5 sequences observed in the lifestyle)

890 **REFERENCES:**

- 891 Agoramoorthy, G., C. Alagappasamy, and M. J. Hsu. 2004. "Can proboscis monkeys be  
892 successfully maintained in captivity? A case of swings and roundabouts." *Zoo Biology*  
893 no. 23 (6):533-544.
- 894 Al-Ghalith, G. A., Ang K., Hillmann B., and Knights D. 2017. *SHI7: A streamlined short-read*  
895 *iterative trimming pipeline*. Zenodo 2017 [cited 1 April 2017 2017]. Available from  
896 <https://github.com/knights-lab/shi7>.
- 897 Al-Ghalith, G. A., and D Knights. 2017. *BURST enables optimal exhaustive DNA alignment for*  
898 *big data* 2017 [cited 1 April 2017 2017]. Available from [https://github.com/knights-](https://github.com/knights-lab/burst)  
899 [lab/burst](https://github.com/knights-lab/burst).
- 900 Amato, K. R., S. R. Leigh, A. Kent, R. I. Mackie, C. J. Yeoman, R. M. Stumpf, B. A. Wilson, K.  
901 E. Nelson, B. A. White, and P. A. Garber. 2014. "The role of gut microbes in satisfying  
902 the nutritional demands of adult and juvenile wild, black howler monkeys (*Alouatta*  
903 *pigra*)." *Am J Phys Anthropol* no. 155 (4):652-64. doi: 10.1002/ajpa.22621.
- 904 Amato, Katherine R., Jessica L. Metcalf, Se Jin Song, Vanessa L. Hale, Jonathan Clayton, Gail  
905 Ackermann, Greg Humphrey, Kefeng Niu, Duoying Cui, Hongxia Zhao, Mark D.  
906 Schrenzel, Chia L. Tan, Rob Knight, and Josephine Braun. 2016. "Using the gut  
907 microbiota as a novel tool for examining colobine primate GI health." *Global Ecology*  
908 *and Conservation* no. 7:225-237. doi: <http://dx.doi.org/10.1016/j.gecco.2016.06.004>.
- 909 Anderson, K. E., J. A. Russell, C. S. Moreau, S. Kautz, K. E. Sullam, Y. Hu, U. Basinger, B. M.  
910 Mott, N. Buck, and D. E. Wheeler. 2012. "Highly similar microbial communities are  
911 shared among related and trophically similar ant species." *Molecular Ecology* no. 21  
912 (9):2282-2296. doi: 10.1111/j.1365-294X.2011.05464.x.
- 913 AOAC. 2012. *Official methods of analysis of AOAC International*: AOAC International.
- 914 Balasubramanian, Deepak, Kok-Fai Kong, Suriya Ravi Jayawardena, Sixto Manuel Leal, Robert  
915 Todd Sautter, and Kalai Mathee. 2011. "Co-regulation of  $\beta$ -lactam resistance, alginate  
916 production and quorum sensing in *Pseudomonas aeruginosa*." *Journal of medical*  
917 *microbiology* no. 60 (2):147-156.
- 918 Barnett, A. 1995. *Expedition field techniques primates*. London: Royal Geographical Society.
- 919 Bauchop, T., and R. W. Martucci. 1968. "Ruminant-like digestion of the langur monkey."  
920 *Science* no. 161 (3842):698-700.
- 921 Belzer, C., and W. M. de Vos. 2012. "Microbes inside--from diversity to function: the case of  
922 *Akkermansia*." *ISME J* no. 6 (8):1449-58. doi: 10.1038/ismej.2012.6.
- 923 Bolger, Anthony M., Marc Lohse, and Bjoern Usadel. 2014. "Trimmomatic: a flexible trimmer  
924 for Illumina sequence data." *Bioinformatics* no. 30 (15):2114-2120.
- 925 Caporaso, J. G., J. Kuczynski, J. Stombaugh, K. Bittinger, F. D. Bushman, E. K. Costello, N.  
926 Fierer, A. G. Pena, J. K. Goodrich, J. I. Gordon, G. A. Huttley, S. T. Kelley, D. Knights,  
927 J. E. Koenig, R. E. Ley, C. A. Lozupone, D. McDonald, B. D. Muegge, M. Pirrung, J.  
928 Reeder, J. R. Sevinsky, P. J. Turnbaugh, W. A. Walters, J. Widmann, T. Yatsunenko, J.  
929 Zaneveld, and R. Knight. 2010. "QIIME allows analysis of high-throughput community  
930 sequencing data." *Nat Methods* no. 7 (5):335-6. doi: 10.1038/nmeth.f.303.
- 931 Caporaso, J. G., C. L. Lauber, W. A. Walters, D. Berg-Lyons, J. Huntley, N. Fierer, S. M.  
932 Owens, J. Betley, L. Fraser, M. Bauer, N. Gormley, J. A. Gilbert, G. Smith, and R.  
933 Knight. 2012. "Ultra-high-throughput microbial community analysis on the Illumina  
934 HiSeq and MiSeq platforms." *ISME J* no. 6 (8):1621-4. doi: 10.1038/ismej.2012.8.



- 935 Chen, Jun, Kyle Bittinger, Emily S. Charlson, Christian Hoffmann, James Lewis, Gary D. Wu,  
936 Ronald G. Collman, Frederic D. Bushman, and Hongzhe Li. 2012. "Associating  
937 microbiome composition with environmental covariates using generalized UniFrac  
938 distances." *Bioinformatics* no. 28 (16):2106-2113.
- 939 Chivers, David J. 1994. "Functional anatomy of the gastrointestinal tract." In *Colobine monkeys:  
940 their ecology, behaviour and evolution*, 205-227. Cambridge: Cambridge University  
941 Press.
- 942 Clarke, R. T. 1979. "Niche in Pasture-Fed Ruminants for the Large Rumen Bacteria *Oscillospira*,  
943 *Lampropedia*, and Quin's and Eadie's Ovals." *Appl Environ Microbiol* no. 37 (3):654-7.
- 944 Clayton, J. B. 2015. *Associations Between Nutrition, Gut Microbial Communities, and Health in  
945 Nonhuman Primates*, University of Minnesota, USA.
- 946 Clayton, J. B., P. Vangay, H. Huang, T. Ward, B. M. Hillmann, G. A. Al-Ghalith, D. A. Travis,  
947 H. T. Long, B. V. Tuan, V. V. Minh, F. Cabana, T. Nadler, B. Toddes, T. Murphy, K. E.  
948 Glander, T. J. Johnson, and D. Knights. 2016. "Captivity humanizes the primate  
949 microbiome." *Proc Natl Acad Sci U S A* no. 113 (37):10376-81. doi:  
950 10.1073/pnas.1521835113.
- 951 Clemente, J. C., E. C. Pehrsson, M. J. Blaser, K. Sandhu, Z. Gao, B. Wang, M. Magris, G.  
952 Hidalgo, M. Contreras, O. Noya-Alarcon, O. Lander, J. McDonald, M. Cox, J. Walter, P.  
953 L. Oh, J. F. Ruiz, S. Rodriguez, N. Shen, S. J. Song, J. Metcalf, R. Knight, G. Dantas, and  
954 M. G. Dominguez-Bello. 2015. "The microbiome of uncontacted Amerindians." *Sci Adv*  
955 no. 1 (3). doi: 10.1126/sciadv.1500183.
- 956 Crissey, S. D., and L. S. Pribyl. 1997. "Utilizing wild foraging ecology information to provide  
957 captive primates with an appropriate diet." *Proc Nutr Soc* no. 56 (3):1083-94.
- 958 David, L. A., C. F. Maurice, R. N. Carmody, D. B. Gootenberg, J. E. Button, B. E. Wolfe, A. V.  
959 Ling, A. S. Devlin, Y. Varma, M. A. Fischbach, S. B. Biddinger, R. J. Dutton, and P. J.  
960 Turnbaugh. 2014. "Diet rapidly and reproducibly alters the human gut microbiome."  
961 *Nature* no. 505 (7484):559-63. doi: 10.1038/nature12820.
- 962 Davies, A. G., and J. F. Oates. 1994. *Colobine Monkeys*: Cambridge Univ Press.
- 963 de Menezes, Alexandre B., Eva Lewis, Michael O'Donovan, Brendan F. O'Neill, Nicholas  
964 Clipson, and Evelyn M. Doyle. 2011. "Microbiome analysis of dairy cows fed pasture or  
965 total mixed ration diets." *FEMS microbiology ecology* no. 78 (2):256-265.
- 966 DeSantis, TZ, P Hugenholtz, K Keller, EL Brodie, N Larsen, YM Piceno, R Phan, and GL  
967 Andersen. 2006. "NASt: a multiple sequence alignment server for comparative analysis  
968 of 16S rRNA genes." *Nucleic acids research* no. 34 (suppl 2):W394.
- 969 Edgar, R. C. 2010. "Search and clustering orders of magnitude faster than BLAST."  
970 *Bioinformatics* no. 26 (19):2460-2461. doi: 10.1093/bioinformatics/btq461.
- 971 Edwards, M. S., S. D. Crissey, and O. T. Oftedal. 1997. Leaf-eating primates: nutrition and  
972 dietary husbandry. In *Fact Sheet 007*, edited by Nutrition Advisory Group.
- 973 Ensley, P. K., T. L. Rost, M. Anderson, K. Benirschke, D. Brockman, and D. Ullrey. 1982.  
974 "Intestinal obstruction and perforation caused by undigested *Acacia* sp leaves in langur  
975 monkeys." *J Am Vet Med Assoc* no. 181 (11):1351-4.
- 976 Everard, A., C. Belzer, L. Geurts, J. P. Ouwerkerk, C. Druart, L. B. Bindels, Y. Guiot, M.  
977 Derrien, G. G. Muccioli, N. M. Delzenne, W. M. de Vos, and P. D. Cani. 2013. "Cross-  
978 talk between *Akkermansia muciniphila* and intestinal epithelium controls diet-induced  
979 obesity." *Proceedings of the National Academy of Sciences of the United States of  
980 America* no. 110 (22):9066-9071. doi: 10.1073/pnas.1219451110.

- 981 Fishbein, L. 1987. "Toluene: uses, occurrence and exposure." *IARC scientific publications*  
982 (85):97-108.
- 983 Fox, John. 2007. "Polycor: polychoric and polyserial correlations." *R package version 0.7-5*,  
984 URL <http://CRAN.R-project.org/package=polycor>.
- 985 Frank, D. N., A. L. St Amand, R. A. Feldman, E. C. Boedeker, N. Harpaz, and N. R. Pace. 2007.  
986 "Molecular-phylogenetic characterization of microbial community imbalances in human  
987 inflammatory bowel diseases." *Proc Natl Acad Sci U S A* no. 104 (34):13780-5. doi:  
988 10.1073/pnas.0706625104.
- 989 Fujimura, K. E., N. A. Slusher, M. D. Cabana, and S. V. Lynch. 2010. "Role of the gut  
990 microbiota in defining human health." *Expert Review of Anti-Infective Therapy* no. 8  
991 (4):435-454. doi: 10.1586/ERI.10.14.
- 992 Gilbert, J. A., F. Meyer, D. Antonopoulos, P. Balaji, C. T. Brown, C. T. Brown, N. Desai, J. A.  
993 Eisen, D. Evers, D. Field, W. Feng, D. Huson, J. Jansson, R. Knight, J. Knight, E.  
994 Kolker, K. Konstantindis, J. Kostka, N. Kyrpides, R. Mackelprang, A. McHardy, C.  
995 Quince, J. Raes, A. Sczyrba, A. Shade, and R. Stevens. 2010. "Meeting report: the  
996 terabase metagenomics workshop and the vision of an Earth microbiome project." *Stand*  
997 *Genomic Sci* no. 3 (3):243-8. doi: 10.4056/sigs.1433550.
- 998 Gloor, Gregory B., Jia Rong Wu, Vera Pawlowsky-Glahn, and Juan José Egozcue. 2016. "It's all  
999 relative: analyzing microbiome data as compositions." *Annals of Epidemiology* no. 26  
1000 (5):322-329. doi: <http://dx.doi.org/10.1016/j.annepidem.2016.03.003>.
- 1001 Goodrich, J. K., J. L. Waters, A. C. Poole, J. L. Sutter, O. Koren, R. Blekhman, M. Beaumont,  
1002 W. Van Treuren, R. Knight, J. T. Bell, T. D. Spector, A. G. Clark, and R. E. Ley. 2014.  
1003 "Human genetics shape the gut microbiome." *Cell* no. 159 (4):789-99. doi:  
1004 10.1016/j.cell.2014.09.053.
- 1005 Gophna, U. 2011. "Microbiology. The guts of dietary habits." *Science* no. 334 (6052):45-6. doi:  
1006 10.1126/science.1213799.
- 1007 Hale, Vanessa Luming Reynolds. 2014. *Co-evolution of gut microbes in colobine monkeys*,  
1008 Purdue University.
- 1009 Jablonski, N. G. . 1998. *The Natural History of the Doucs and Snub-nosed Monkeys*. Singapore:  
1010 World Scientific Publishing.
- 1011 James, Denis H., and William M. Castor. 1994. "Styrene." *Ullmann's Encyclopedia of Industrial*  
1012 *Chemistry*.
- 1013 Kanehisa, M., and S. Goto. 2000. "KEGG: kyoto encyclopedia of genes and genomes." *Nucleic*  
1014 *Acids Res* no. 28 (1):27-30.
- 1015 Knights, Dan, Mark S. Silverberg, Rinse K. Weersma, Dirk Gevers, Gerard Dijkstra, Hailiang  
1016 Huang, Andrea D. Tyler, Suzanne van Sommeren, Floris Imhann, and Joanne M.  
1017 Stempak. 2014. "Complex host genetics influence the microbiome in inflammatory bowel  
1018 disease." *Genome medicine* no. 6 (12):107.
- 1019 Kogevinas, Manolis, Timo Kauppinen, Regina Winkelmann, Heiko Becher, Pier Alberto  
1020 Bertazzi, H. Bas Bueno-de-Mesquita, David Coggon, Lois Green, Eric Johnson, and  
1021 Margareta Littorin. 1995. "Soft tissue sarcoma and non-Hodgkin's lymphoma in workers  
1022 exposed to phenoxy herbicides, chlorophenols, and dioxins: two nested case-control  
1023 studies." *Epidemiology*:396-402.
- 1024 Kohl, K. D., M. M. Skopec, and M. D. Dearing. 2014. "Captivity results in disparate loss of gut  
1025 microbial diversity in closely related hosts." *Conservation Physiology* no. 2 (1). doi:  
1026 ARTN cou009

- 1027 10.1093/conphys/cou009.
- 1028 Lacasse, Claude, Kathryn C. Gamble, Robert H. Poppenga, Lisa L. Farina, Jennifer Landolfi, and  
1029 Karen Terio. 2007. "Taxus sp. intoxication in three Francois' langurs (*Trachypithecus*  
1030 *francoisi*)." *Journal of Veterinary Diagnostic Investigation* no. 19 (2):221-224.
- 1031 Lambert, J. E. 1998. "Primate digestion: Interactions among anatomy, physiology, and feeding  
1032 ecology." *Evolutionary Anthropology* no. 7 (1):8-20. doi: 10.1002/(sici)1520-  
1033 6505(1998)7:1<8::aid-evan3>3.3.co;2-j.
- 1034 Langille, M. G., J. Zaneveld, J. G. Caporaso, D. McDonald, D. Knights, J. A. Reyes, J. C.  
1035 Clemente, D. E. Burkepile, R. L. Vega Thurber, R. Knight, R. G. Beiko, and C.  
1036 Huttenhower. 2013. "Predictive functional profiling of microbial communities using 16S  
1037 rRNA marker gene sequences." *Nat Biotechnol* no. 31 (9):814-21. doi: 10.1038/nbt.2676.
- 1038 Ley, R. E., P. J. Turnbaugh, S. Klein, and J. I. Gordon. 2006. "Microbial ecology: human gut  
1039 microbes associated with obesity." *Nature* no. 444 (7122):1022-3. doi:  
1040 10.1038/4441022a.
- 1041 Ley, Ruth E., Micah Hamady, Catherine Lozupone, Peter J. Turnbaugh, Rob Roy Ramey, J.  
1042 Stephen Bircher, Michael L. Schlegel, Tammy A. Tucker, Mark D. Schrenzel, Rob  
1043 Knight, and Jeffrey I. Gordon. 2008. "Evolution of Mammals and Their Gut Microbes."  
1044 *Science* no. 320 (5883):1647-1651. doi: 10.1126/science.1155725.
- 1045 Lippold, L.K, and V.N Thanh. 2008. "The time is now: survival of the douc langurs of Son Tra,  
1046 Vietnam." *Primate Conservation* no. 23 (1):75-79.
- 1047 Lozupone, C., and R. Knight. 2005. "UniFrac: a new phylogenetic method for comparing  
1048 microbial communities." *Appl Environ Microbiol* no. 71 (12):8228-35. doi:  
1049 10.1128/AEM.71.12.8228-8235.2005.
- 1050 Lu, Lingeng. 2006. *Autoinducer 2-based quorum sensing response of Escherichia coli to sub-*  
1051 *therapeutic tetracycline exposure*, Texas A&M University.
- 1052 Mackie, R. I., R. I. Aminov, W. P. Hu, A. V. Klieve, D. Ouwkerk, M. A. Sundset, and Y.  
1053 Kamagata. 2003. "Ecology of uncultivated *Oscillospira* species in the rumen of cattle,  
1054 sheep, and reindeer as assessed by microscopy and molecular approaches." *Applied and*  
1055 *Environmental Microbiology* no. 69 (11):6808-6815. doi: 10.1128/AEM.69.11.6808-  
1056 6815.2003.
- 1057 Magoč, Tanja, and Steven L. Salzberg. 2011. "FLASH: fast length adjustment of short reads to  
1058 improve genome assemblies." *Bioinformatics* no. 27 (21):2957-2963.
- 1059 Martinez, I., J. C. Stegen, M. X. Maldonado-Gomez, A. M. Eren, P. M. Siba, A. R. Greenhill,  
1060 and J. Walter. 2015. "The gut microbiota of rural papua new guineans: composition,  
1061 diversity patterns, and ecological processes." *Cell Rep* no. 11 (4):527-38. doi:  
1062 10.1016/j.celrep.2015.03.049.
- 1063 McMurdie, Paul J., and Susan Holmes. 2013. "phyloseq: an R package for reproducible  
1064 interactive analysis and graphics of microbiome census data." *PloS one* no. 8 (4):e61217.
- 1065 Minh, Nguyen Hung, Thomas Boivin, Pham Ngoc Canh, and Le Ke Son. 2009. "Comprehensive  
1066 assessment of dioxin contamination in Da Nang airbase and its vicinities: Environmental  
1067 levels, human exposure and options for mitigating impacts." *Interdisciplinary Studies on*  
1068 *Environmental Chemistry-Environmental Research in Asia*:21-29.
- 1069 Moeller, A. H., Y. Li, E. Mpoudi Ngole, S. Ahuka-Mundeke, E. V. Lonsdorf, A. E. Pusey, M.  
1070 Peeters, B. H. Hahn, and H. Ochman. 2014. "Rapid changes in the gut microbiome during  
1071 human evolution." *Proc Natl Acad Sci U S A* no. 111 (46):16431-5. doi:  
1072 10.1073/pnas.1419136111.

- 1073 Muegge, B. D., J. Kuczynski, D. Knights, J. C. Clemente, A. Gonzalez, L. Fontana, B. Henrissat,  
1074 R. Knight, and J. I. Gordon. 2011. "Diet drives convergence in gut microbiome functions  
1075 across mammalian phylogeny and within humans." *Science* no. 332 (6032):970-4. doi:  
1076 10.1126/science.1198719.
- 1077 Nijboer, J. 2006. *Fibre intake and faeces quality in leaf-eating primates*, University of Utrecht.
- 1078 Nijboer, J, M Clauss, H Everts, and AC Beynen. 2006. *Effect of dietary fibre on the faeces score*  
1079 *in colobine monkeys in Dutch Zoos*, FIBRE INTAKE AND FAECES QUALITY IN  
1080 LEAF-EATING PRIMATES.
- 1081 Nijboer, J, M Clauss, and M Olsthoorn. 2006. "Effect of diet on the feces quality in Javan langur  
1082 (*Trachypithecus auratus auratus*)."  
*Journal of Zoo and ...*
- 1083 Oftedal, Olav T., and Mary E. Allen. 1996. "The feeding and nutrition of omnivores with  
1084 emphasis on primates." In *Wild mammals in captivity: principles and techniques.*, edited  
1085 by Devra G. Kleiman, Mary E. Allen, Katerina V. Thompson, Susan Lumpkin and Holly  
1086 Harris, 148-157. Chicago & London: University of Chicago Press.
- 1087 Oksanen, Jari, Roeland Kindt, Pierre Legendre, Bob O'Hara, M. Henry H. Stevens, Maintainer  
1088 Jari Oksanen, and Mass Suggests. 2007. "The vegan package." *Community ecology*  
1089 *package* no. 10:631-637.
- 1090 Olajos, Eugene J., and Woodhall Stopford. 2004. *Riot Control Agents: Issues in Toxicology,*  
1091 *Safety & Health*: CRC Press.
- 1092 Otto, C. 2005. *Food intake, nutrient intake, and food selection in captive and semi-free douc*  
1093 *langur*, Schuling Verlag, Munster.
- 1094 Overskei, Timothy L., Gordon Pirie, Ronald S. Veazey, Carol C. Vice, Clifton M. Monahan, and  
1095 Sheldon W. Bivin. 1994. "Entamoeba histolytica infection in hanuman (*Semnopithecus*  
1096 *entellus*) and purple-faced (*Trachypithecus vetulus*) langurs." *Journal of Zoo and Wildlife*  
1097 *Medicine* no. 25 (2):240-247.
- 1098 Paradis, Emmanuel, Julien Claude, and Korbinian Strimmer. 2004. "APE: analyses of  
1099 phylogenetics and evolution in R language." *Bioinformatics* no. 20 (2):289-290.
- 1100 Power, Michael L., Barbara Toddes, and Liz Koutsos. 2012. "Nutrient Requirements and Dietary  
1101 Husbandry Principles for Captive Nonhuman Primates." In *Nonhuman Primates in*  
1102 *Biomedical Research (Second Edition)*, edited by Keith Mansfield, Suzette Tardif and  
1103 Timothy Morris, 269-286. Boston: Academic Press.
- 1104 Purushe, J., D. E. Fouts, M. Morrison, B. A. White, R. I. Mackie, Bacteria North American  
1105 Consortium for Rumen, P. M. Coutinho, B. Henrissat, and K. E. Nelson. 2010.  
1106 "Comparative genome analysis of *Prevotella ruminicola* and *Prevotella bryantii*: insights  
1107 into their environmental niche." *Microb Ecol* no. 60 (4):721-9. doi: 10.1007/s00248-010-  
1108 9692-8.
- 1109 Roeselers, G., E. K. Mittge, W. Z. Stephens, D. M. Parichy, C. M. Cavanaugh, K. Guillemin, and  
1110 J. F. Rawls. 2011. "Evidence for a core gut microbiota in the zebrafish." *ISME J* no. 5  
1111 (10):1595-608. doi: 10.1038/ismej.2011.38.
- 1112 Schecter, Arnold, Linda Birnbaum, John J. Ryan, and John D. Constable. 2006. "Dioxins: an  
1113 overview." *Environmental research* no. 101 (3):419-428.
- 1114 Schwitzer, C., and W. Kaumanns. 2003. "Foraging patterns of free-ranging and captive primates-  
1115 implications for captive feeding regimes." In *Zoo Animal Nutrition Vol. II*, edited by A.  
1116 Fidgett, M. Clauss, U. Ganslober, J. M. Hatt and J. Nijboer, 247-265. Amsterdam, NE:  
1117 Filander Verlag.



- 1118 Templ, M., A. Kowarik, and P. Filzmoser. 2011. "Iterative stepwise regression imputation using  
1119 standard and robust methods." *Computational Statistics & Data Analysis* no. 55  
1120 (10):2793-2806. doi: 10.1016/j.csda.2011.04.012.
- 1121 Tremblay, Jean-Francois. 2011. "Making Aromatics in Singapore." *Chemical & Engineering  
1122 News Archive* no. 89 (38):18-19. doi: 10.1021/cen-v089n038.p018.
- 1123 Tsilimigras, M. C., and A. A. Fodor. 2016. "Compositional data analysis of the microbiome:  
1124 fundamentals, tools, and challenges." *Ann Epidemiol* no. 26 (5):330-5. doi:  
1125 10.1016/j.annepidem.2016.03.002.
- 1126 Turnbaugh, P. J., M. Hamady, T. Yatsunencko, B. L. Cantarel, A. Duncan, R. E. Ley, M. L.  
1127 Sogin, W. J. Jones, B. A. Roe, J. P. Affourtit, M. Egholm, B. Henrissat, A. C. Heath, R.  
1128 Knight, and J. I. Gordon. 2009. "A core gut microbiome in obese and lean twins." *Nature*  
1129 no. 457 (7228):480-4. doi: 10.1038/nature07540.
- 1130 Turnbaugh, P. J., R. E. Ley, M. A. Mahowald, V. Magrini, E. R. Mardis, and J. I. Gordon. 2006.  
1131 "An obesity-associated gut microbiome with increased capacity for energy harvest."  
1132 *Nature* no. 444 (7122):1027-31. doi: 10.1038/nature05414.
- 1133 Ulibarri, L. R. 2013. *The socioecology of red-shanked doucs (Pygathrix nemaeus ) in Son Tra  
1134 Nature Reserve, Vietnam*, University of Colorado, USA.
- 1135 Van den Boogaart, K. Gerald, and Raimon Tolosana-Delgado. 2013. *Analyzing compositional  
1136 data with R*. Vol. 122: Springer.
- 1137 Wang, M., E. C. Radlowski, M. H. Monaco, G. C. Fahey, Jr., H. R. Gaskins, and S. M. Donovan.  
1138 2013. "Mode of delivery and early nutrition modulate microbial colonization and  
1139 fermentation products in neonatal piglets." *J Nutr* no. 143 (6):795-803. doi:  
1140 10.3945/jn.112.173096.
- 1141 Wang, Q., G. M. Garrity, J. M. Tiedje, and J. R. Cole. 2007. "Naive Bayesian classifier for rapid  
1142 assignment of rRNA sequences into the new bacterial taxonomy." *Applied and  
1143 Environmental Microbiology* no. 73 (16):5261-5267. doi: 10.1128/AEM.00062-07.
- 1144 Welch, Vincent A., and Kevin J. Fallon. 2005. "Ethylbenzene." *Ullmann's Encyclopedia of  
1145 Industrial Chemistry*.
- 1146 Wickham, Hadley. 2016. *ggplot2: elegant graphics for data analysis*: Springer.
- 1147 Wu, G. D., J. Chen, C. Hoffmann, K. Bittinger, Y. Y. Chen, S. A. Keilbaugh, M. Bewtra, D.  
1148 Knights, W. A. Walters, R. Knight, R. Sinha, E. Gilroy, K. Gupta, R. Baldassano, L.  
1149 Nessel, H. Li, F. D. Bushman, and J. D. Lewis. 2011. "Linking long-term dietary patterns  
1150 with gut microbial enterotypes." *Science* no. 334 (6052):105-8. doi:  
1151 10.1126/science.1208344.
- 1152 Xu, Z., and R. Knight. 2015. "Dietary effects on human gut microbiome diversity." *Br J Nutr* no.  
1153 113 Suppl:S1-5. doi: 10.1017/S0007114514004127.
- 1154 Yanagita, K., A. Manome, X. Y. Meng, S. Hanada, T. Kanagawa, T. Tsuchida, R. I. Mackie, and  
1155 Y. Kamagata. 2003. "Flow cytometric sorting, phylogenetic analysis and in situ detection  
1156 of *Oscillospira guillermondii*, a large, morphologically conspicuous but uncultured  
1157 ruminal bacterium." *Int J Syst Evol Microbiol* no. 53 (Pt 5):1609-14. doi:  
1158 10.1099/ijss.0.02541-0.
- 1159 Yatsunencko, T., F. E. Rey, M. J. Manary, I. Trehan, M. G. Dominguez-Bello, M. Contreras, M.  
1160 Magris, G. Hidalgo, R. N. Baldassano, A. P. Anokhin, A. C. Heath, B. Warner, J. Reeder,  
1161 J. Kuczynski, J. G. Caporaso, C. A. Lozupone, C. Lauber, J. C. Clemente, D. Knights, R.  
1162 Knight, and J. I. Gordon. 2012. "Human gut microbiome viewed across age and  
1163 geography." *Nature* no. 486 (7402):222-7. doi: 10.1038/nature11053.



- 1164 Yu, Z, and M Morrison. 2004. "Improved extraction of PCR-quality community DNA from  
1165 digesta and fecal samples." *Biotechniques* no. 36 (5):808-813.
- 1166 Zhang, C. H., M. H. Zhang, S. Y. Wang, R. J. Han, Y. F. Cao, W. Y. Hua, Y. J. Mao, X. J.  
1167 Zhang, X. Y. Pang, C. C. Wei, G. P. Zhao, Y. Chen, and L. P. Zhao. 2010. "Interactions  
1168 between gut microbiota, host genetics and diet relevant to development of metabolic  
1169 syndromes in mice." *Isme Journal* no. 4 (2):232-241. doi: 10.1038/ismej.2009.112.
- 1170 Zhao, L., G. Wang, P. Siegel, C. He, H. Wang, W. Zhao, Z. Zhai, F. Tian, J. Zhao, H. Zhang, Z.  
1171 Sun, W. Chen, Y. Zhang, and H. Meng. 2013. "Quantitative genetic background of the  
1172 host influences gut microbiomes in chickens." *Sci Rep* no. 3:1163. doi:  
1173 10.1038/srep01163.
- 1174 Zoetendal, E. G., P. G. Puylaert, J. H. Ou, K. Vipperla, F. M. Brouard, E. H. Ruder, K. Newton,  
1175 F. Carbonero, H. R. Gaskins, W. M. de Vos, and S. J. O'Keefe. 2013. "Distinct  
1176 Microbiotas Are Present in Urban and Rural Native South Africans, and in African  
1177 Americans." *Gastroenterology* no. 144 (5):S347-S347.  
1178
